# Supplementary material for: Transcriptome analysis of oil palm inflorescences revealed candidate genes for an auxin signaling pathway involved in parthenocarpy
Source: PeerJ journal article supplement (doi:10.7717/peerj.5975), 2018-12-17
Supplement: Fig._S1_(edited).pdf [file Fig._S1_%28edited%29.pdf]

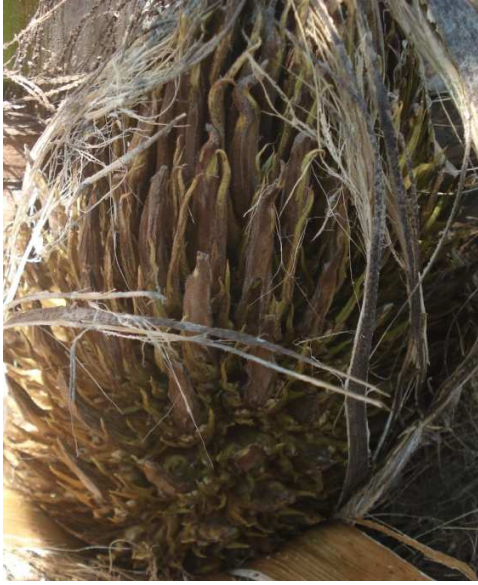

Inflo.4T at DAP = 0

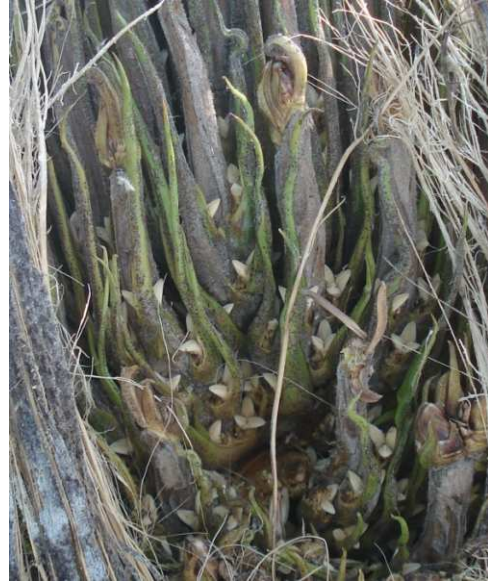

Inflo.8T at DAP = 1

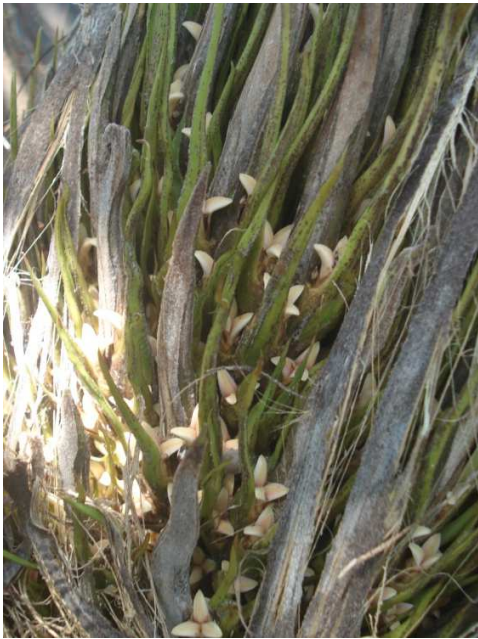

Inflo.11T at DAP = 2

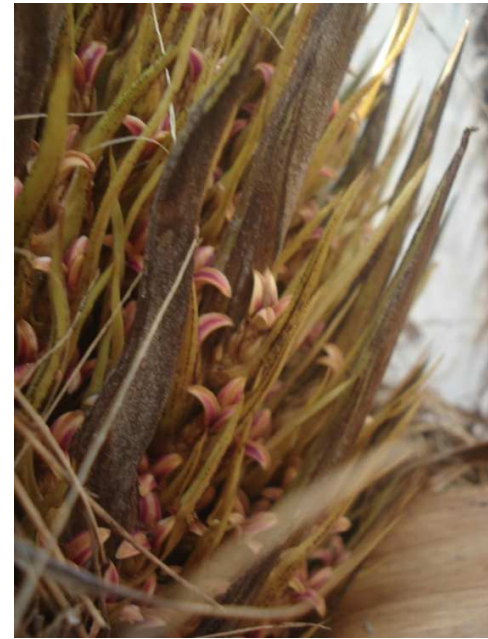

Inflo.13T at DAP = 3
