# Supplementary material for: Transcriptome analysis of oil palm inflorescences revealed candidate genes for an auxin signaling pathway involved in parthenocarpy
Source: PeerJ journal article supplement (doi:10.7717/peerj.5975), 2018-12-17
Supplement: Fig._S2_(edited).pdf [file Fig._S2_%28edited%29.pdf]

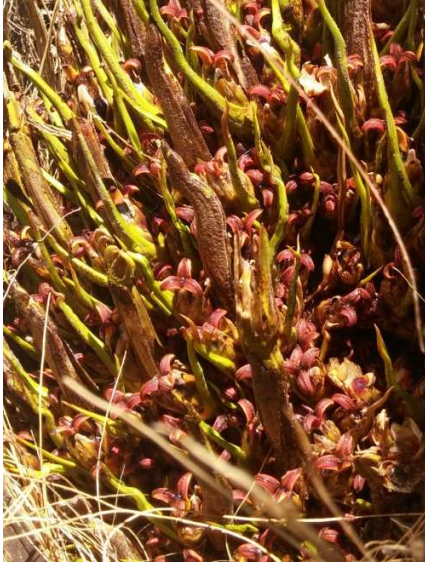

Inflo.3T

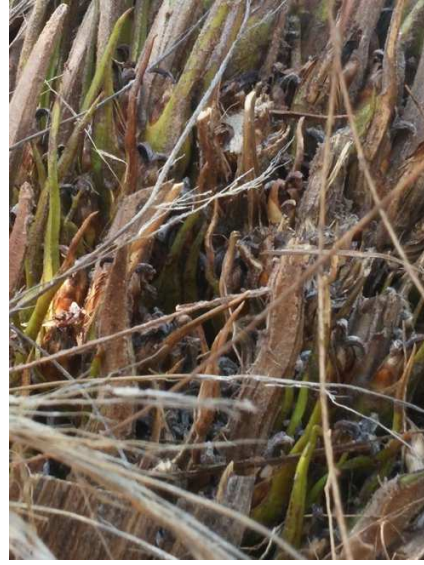

Inflo.4C

A

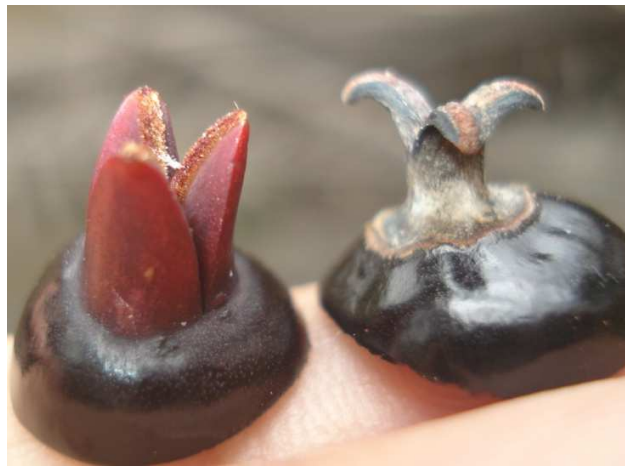

Inflo.1T fruit

Inflo.1C fruit

B
