# Supplementary material for: Transcriptome analysis of oil palm inflorescences revealed candidate genes for an auxin signaling pathway involved in parthenocarpy
Source: PeerJ journal article supplement (doi:10.7717/peerj.5975), 2018-12-17

### KEGG pathways for the nonredundant DEGs

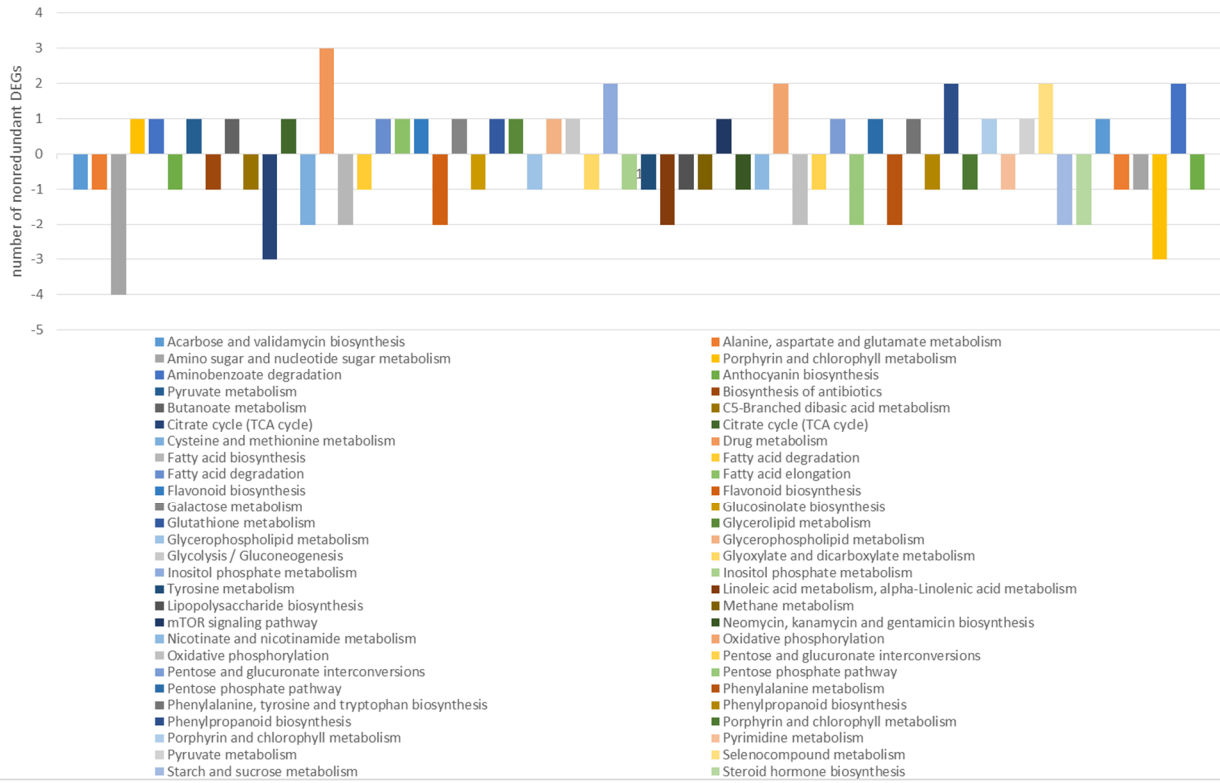

Supplement: Fig._S3.pdf [file Fig._S3.pdf]
