# Supplementary material for: Transcriptome analysis of oil palm inflorescences revealed candidate genes for an auxin signaling pathway involved in parthenocarpy
Source: PeerJ. 2018 Dec 17;6:e5975. doi: 10.7717/peerj.5975 (PMC6301279; doi:10.7717/peerj.5975)
Supplement: Supplemental Information 8 — The 1st comparison was between Inflo.1T/WA (Tt) and Inflo.1C/NA (Ct). The 2nd comparison was between Inflo.1T/WA (Tt) and Inflo.1T/NA (Ct). The 3rd comparison was between Inflo.6T/WA (Tt) and Inflo.2C/NA2 (Ct). The 4th comparison was between Inflo.6T/WA (Tt) and Inflo.2C/NA1 (Ct). The 5th comparison was between Inflo.6T/WA (Ct) and Inflo.4C/NA (Ct). The 6th comparison was between Inflo.4T/WA (Tt) and Inflo.2C/NA2 (Ct). The 7th comparison was between Inflo.4T/WA (Tt) and Inflo.2C/NA1 (Ct). The 8th comparison was between Inflo.4T/WA (Tt) and Inflo.4C/NA (Ct). [file peerj-06-5975-s008.xlsx]

## Sheet: Inflo.1T WA and Inflo.1C NA
gene	log2FoldChange	padj	product	Pathway
cds10357	-2.89768	3.71753e-09	product=aconitate hydratase%2C cytoplasmic	Glyoxylate and dicarboxylate metabolism, Carbon fixation pathways in prokaryotes, Citrate cycle (TCA cycle)
cds10500	-2.23901	0.00148312	product=small heat shock protein%2C chloroplastic-like	NA
cds11388	-3.39199	9.66437e-12	product=LOW QUALITY PROTEIN: subtilisin-like protease SBT1.3	NA
cds11438	-6.67869	0.00235981	product=probable methyltransferase PMT15	NA
cds11780	2.86686	1.02845e-06	product=PLAT domain-containing protein 3-like	NA
cds12062	-5.82806	0.0458477	product=non-specific phospholipase C4	Glycerophospholipid metabolism, Aminobenzoate degradation, Ether lipid metabolism, Riboflavin metabolism
cds12115	-6.09598	0.011257	product=inactive poly [ADP-ribose] polymerase RCD1	NA
cds12764	1.47582	0.00462812	product=histone H2B-like	NA
cds13622	-0.614778	6.87349e-05	product=polyphenol oxidase%2C chloroplastic-like	NA
cds13670	-5.2395	0.0439272	product=pectinesterase-like	Pentose and glucuronate interconversions
cds14411	2.87227	8.69013e-18	product=cation/H(+) antiporter 15	NA
cds14493	4.65657	0.0428989	product=vacuolar-sorting receptor 1	NA
cds14506	-1.29818	0.0458455	product=probable chalcone--flavonone isomerase 3	NA
cds14927	1.07383	6.17556e-07	product=heat shock cognate 70 kDa protein 2	NA
cds15097	-1.01792	0.0016512	product=18.1 kDa class I heat shock protein	NA
cds1517	2.80064	2.58832e-65	product=uncharacterized protein LOC105049307	NA
cds15463	2.77157	0.0366247	product=early light-induced protein 1%2C chloroplastic	NA
cds15853	2.39276	0.0166264	product=polyubiquitin 11	NA
cds16136	-5.82816	0.0439272	product=T-complex protein 1 subunit gamma	NA
cds16162	-4.99014	1.31678e-07	product=LOW QUALITY PROTEIN: serine/threonine-protein kinase BLUS1-like	NA
cds16522	-2.2056	0.0234591	product=chaperone protein ClpB1-like	NA
cds16622	-3.80798	2.37597e-05	product=BURP domain-containing protein 3	NA
cds17264	-2.34031	3.04809e-19	product=17.3 kDa class II heat shock protein-like	NA
cds17369	-3.74621	0.00059887	product=RGG repeats nuclear RNA binding protein A	NA
cds17665	-4.43752	2.15894e-09	product=BAG family molecular chaperone regulator 6-like	NA
cds17666	-5.51033	0.0213435	product=uncharacterized protein LOC109506047	NA
cds17830	1.46051	0.0133811	product=eukaryotic translation initiation factor 1A-like	NA
cds18069	-4.39085	2.35943e-29	product=18.1 kDa class I heat shock protein	NA
cds18107	-2.35921	0.0345236	product=tubulin beta-5 chain	NA
cds18319	1.35526	3.42534e-10	product=inositol-3-phosphate synthase	NA
cds18355	-2.7469	0.0495934	product=homeobox-leucine zipper protein HOX21	NA
cds18536	-1.81656	0.00171109	product=LOW QUALITY PROTEIN: 60S ribosomal protein L17	NA
cds18906	-2.3769	0.000499928	product=uncharacterized protein LOC105049237	NA
cds19091	-5.39504	0.0474816	product=uncharacterized protein LOC105049460	NA
cds19211	-4.06578	0.0223977	product=trichohyalin	NA
cds19265	-1.19519	0.028967	product=oryzain alpha chain	NA
cds19287	-4.87785	0.0458455	product=probable CCR4-associated factor 1 homolog 7	NA
cds19936	-4.393	0.0113028	product=uncharacterized protein LOC105050057	NA
cds20728	-5.51099	0.0214623	product=18.1 kDa class I heat shock protein	NA
cds20910	-5.23849	0.0184037	product=heat shock 70 kDa protein-like	NA
cds21009	-1.0466	6.09759e-28	product=uncharacterized protein LOC105050802	NA
cds21082	-4.58652	0.000499928	product=GATA transcription factor 20-like	NA
cds21205	-1.66542	0.0345236	product=chalcone synthase 2	Flavonoid biosynthesis
cds21588	-5.83161	0.0295972	product=LOW QUALITY PROTEIN: protein NBR1 homolog	NA
cds21737	-1.52358	0.0162889	product=stromal 70 kDa heat shock-related protein%2C chloroplastic	NA
cds22310	-1.23136	1.56614e-06	product=receptor-like protein kinase	NA
cds22608	1.34198	0.000499928	product=knob-associated histidine-rich protein-like	NA
cds23332	4.80114	0.0345991	product=lactoylglutathione lyase	Pyruvate metabolism
cds23504	-3.73984	2.09614e-09	product=late embryogenesis abundant protein Lea5-D	NA
cds23821	4.96071	0.039448	product=60S ribosomal protein L39	NA
cds24888	4.61268	0.044715	product=40S ribosomal protein S17	NA
cds25140	-3.18292	0.0198617	product=uncharacterized protein LOC105054085	NA
cds25219	-5.83434	0.0300894	product=auxin-responsive protein SAUR36-like	NA
cds25254	1.94588	0.044715	product=14 kDa proline-rich protein DC2.15-like	NA
cds26002	-1.86048	1.68662e-14	product=naringenin%2C2-oxoglutarate 3-dioxygenase	NA
cds26496	-1.85647	1.77517e-05	product=endoplasmin homolog	Purine metabolism, Thiamine metabolism
cds26665	-2.56454	4.84269e-05	product=probable flavin-containing monooxygenase 1	NA
cds27118	5.62249	0.00840007	product=protein WALLS ARE THIN 1	NA
cds27465	-1.85816	5.88647e-09	product=phenylalanine ammonia-lyase	Phenylalanine metabolism, Phenylpropanoid biosynthesis
cds27668	-1.51713	0.0110123	product=flavonoid 3'-monooxygenase-like	NA
cds27784	-2.16084	0.0162889	product=flavonol 3-sulfotransferase-like	Tryptophan metabolism, Glucosinolate biosynthesis
cds28254	-1.62189	0.00200519	product=myb-related protein Myb4-like	NA
cds28606	-2.26038	0.00644316	product=uncharacterized protein LOC105056687	NA
cds28916	1.30612	7.46487e-07	product=histone H2B-like	NA
cds28925	1.25378	0.00685123	product=histone H2B.11-like	NA
cds28952	-1.13508	0.000267584	product=probable mediator of RNA polymerase II transcription subunit 37c	NA
cds29071	-3.19975	0.0162889	product=pentatricopeptide repeat-containing protein At3g46790%2C chloroplastic	NA
cds30141	-4.23694	0.011937	product=uncharacterized protein LOC105057911	NA
cds30465	-4.39171	0.0123842	product=proline-rich receptor-like protein kinase PERK4	NA
cds30491	1.48441	0.00488224	product=glycine-rich RNA-binding protein GRP2A	NA
cds30797	-6.6834	0.00275782	product=probable LRR receptor-like serine/threonine-protein kinase At3g47570	NA
cds30980	-4.07037	0.0495934	product=26S protease regulatory subunit 7	NA
cds3124	-3.37242	2.15894e-09	product=leucine-rich repeat receptor-like protein kinase PXC1	NA
cds31448	-0.829127	0.0495934	product=ABC transporter F family member 1	NA
cds31568	1.19484	0.0113762	product=probable aquaporin PIP1-2	NA
cds31997	-0.985136	0.00869014	product=histone H1-like	NA
cds32043	-1.69568	0.000383202	product=naringenin%2C2-oxoglutarate 3-dioxygenase	NA
cds32128	-1.54119	9.29674e-11	product=heat shock protein 83	NA
cds32233	-3.25873	0.000418198	product=protein NTM1-like 9	NA
cds32629	4.83849	0.039448	product=tubulin beta chain	NA
cds32638	-3.52608	0.0127995	product=auxin-responsive protein SAUR71-like	NA
cds32850	-6.09862	0.0194186	product=uncharacterized protein LOC105059954	NA
cds33003	-1.25422	0.0167203	product=tubulin alpha chain	NA
cds33322	-1.93737	1.9689e-07	product=calnexin homolog	NA
cds34788	-2.83121	0.00222421	product=ribosomal RNA-processing protein 14-C	NA
cds35118	-1.68661	0.00771883	product=probable nucleolar protein 5-2	NA
cds35164	2.31696	0.000404418	product=probable glutathione S-transferase GSTF1	Glutathione metabolism, Metabolism of xenobiotics by cytochrome P450, Drug metabolism - cytochrome P450
cds35952	-3.803	0.00668746	product=internal alternative NAD(P)H-ubiquinone oxidoreductase A1%2C mitochondrial	NA
cds36032	-6.3146	0.0166264	product=putative UDP-rhamnose:rhamnosyltransferase 1	NA
cds36089	-3.52674	0.0191262	product=probable LRR receptor-like serine/threonine-protein kinase At3g47570	NA
cds36213	-5.05891	0.0115345	product=uncharacterized protein LOC105032965	NA
cds36448	-3.44777	6.17556e-07	product=exportin-7-B-like	NA
cds36494	-1.89417	0.0486188	product=putative quinone-oxidoreductase homolog%2C chloroplastic	NA
cds36510	-3.33854	1.05141e-10	product=FHA domain-containing protein FHA2	NA
cds37099	-2.92378	1.31108e-05	product=probable arabinose 5-phosphate isomerase	Lipopolysaccharide biosynthesis, Drug metabolism - other enzymes
cds37479	-1.41619	7.07356e-19	product=uncharacterized protein LOC109505017	NA
cds37481	-0.48008	0.0480564	product=uncharacterized protein LOC105033943	NA
cds37524	-6.30968	0.0162889	product=EIN3-binding F-box protein 1-like	NA
cds37896	-3.34219	0.017576	product=calcium-dependent protein kinase 26	NA
cds37955	1.1797	0.027402	product=dnaJ protein homolog	NA
cds38314	-3.26317	0.00151582	product=wall-associated receptor kinase-like 14	NA
cds39520	-4.38784	0.00213026	product=uncharacterized protein LOC105035506	NA
cds39862	-3.79856	0.0194186	product=coiled-coil domain-containing protein SCD2	NA
cds40107	-1.15329	0.0194186	product=chalcone--flavonone isomerase	NA
cds41563	5.17945	0.0120897	product=BURP domain-containing protein 6-like	NA
cds41803	-0.603327	0.00855766	product=ribosomal protein S16	NA
cds41817	-1.64007	0.00192585	product=photosystem II CP43 chlorophyll apoprotein	NA
cds41827	-0.988881	0.0194186	product=ATP synthase CF1 epsilon subunit	NA
cds41850	-2.18355	0.000178288	product=photosystem II phosphoprotein	NA
cds41854	-1.36792	8.86656e-19	product=ribosomal protein S11	NA
cds41857	0.72727	0.0205679	product=ribosomal protein S8	NA
cds41858	-1.16784	0.00131262	product=ribosomal protein L14	NA
cds41866	-1.67976	0.0131188	product=NADH dehydrogenase subunit 2	NA
cds41880	0.702929	2.57054e-05	product=hypothetical protein RF1	NA
cds4405	-4.47359	1.0971e-257	product=probable splicing factor 3A subunit 1	NA
cds5036	-2.61461	0.000170646	product=22.7 kDa class IV heat shock protein-like	NA
cds5037	-2.91548	0.0162889	product=22.0 kDa class IV heat shock protein-like	NA
cds5147	-3.54316	6.87273e-07	product=proteasome subunit beta type-5-like	NA
cds5288	-3.18716	0.0166264	product=probable metal-nicotianamine transporter YSL6	NA
cds5948	2.37438	0.037864	product=plasma membrane ATPase	Oxidative phosphorylation
cds6328	-3.80425	0.0099536	product=probable alpha%2Calpha-trehalose-phosphate synthase [UDP-forming] 9	Starch and sucrose metabolism
cds677	-1.1371	0.017576	product=ketol-acid reductoisomerase%2C chloroplastic	Biosynthesis of antibiotics, Pantothenate and CoA biosynthesis, Valine, leucine and isoleucine biosynthesis
cds7450	-4.4604	6.21049e-18	product=17.3 kDa class II heat shock protein-like	NA
cds7451	-5.51118	0.0191262	product=17.1 kDa class II heat shock protein-like	NA
cds7766	-4.19355	1.33664e-13	product=transcription repressor OFP7-like	NA
cds8044	-2.42264	3.49785e-05	product=BAG family molecular chaperone regulator 6	NA
cds8110	4.80566	0.0391001	product=mitochondrial import inner membrane translocase subunit TIM17-2	NA
cds8343	-1.09517	1.31678e-07	product=trans-resveratrol di-O-methyltransferase-like	NA
cds8711	-5.51382	0.0474816	product=endonuclease 4	NA
cds8753	-4.06895	0.000993574	product=18.1 kDa class I heat shock protein	NA
cds8754	-3.0161	2.00355e-07	product=18.1 kDa class I heat shock protein-like	NA
cds8755	-3.88682	2.95462e-20	product=16.9 kDa class I heat shock protein 2-like	NA
cds8759	-1.96579	9.40969e-14	product=16.9 kDa class I heat shock protein 2	NA
cds9134	1.72752	0.000575772	product=inositol-3-phosphate synthase-like	Inositol phosphate metabolism, Streptomycin biosynthesis
cds9342	-6.9698	0.00111963	product=putative lipoxygenase 5	Linoleic acid metabolism, alpha-Linolenic acid metabolism
cds9596	4.9604	0.027405	product=uncharacterized protein LOC105041988	NA
cds9599	-7.21076	0.00124565	product=transcription factor bHLH78	NA
cds9688	-5.83446	0.0360606	product=LOW QUALITY PROTEIN: subtilisin-like protease SBT1.8	NA
cds9854	-5.97621	0.00771883	product=pentatricopeptide repeat-containing protein At5g08510-like	NA

## Sheet: Inflo.1T WA and Inflo.1T NA
gene	log2FoldChange	padj	product	Pathway
cds10162	-1.45682	0.0473485	product=methyl-CpG-binding domain-containing protein 11	NA
cds10500	4.54898	0.0170805	product=small heat shock protein%2C chloroplastic-like	NA
cds11388	-2.39675	1.96303e-06	product=LOW QUALITY PROTEIN: subtilisin-like protease SBT1.3	NA
cds11780	1.40956	9.82956e-06	product=PLAT domain-containing protein 3-like	NA
cds12499	1.76277	0.0268882	product=protein disulfide isomerase-like 1-4	NA
cds12764	1.58938	9.61819e-06	product=histone H2B-like	NA
cds12923	-0.876021	0.0429596	product=elongation factor 1-alpha	Thiamine metabolism
cds13583	2.91352	0.00158849	product=universal stress protein A-like protein	NA
cds13622	0.560106	0.000131705	product=polyphenol oxidase%2C chloroplastic-like	NA
cds13727	-0.974844	9.21683e-10	product=translationally-controlled tumor protein homolog	NA
cds13758	-1.57956	0.000548205	product=40S ribosomal protein S21	NA
cds14411	2.12117	6.67408e-27	product=cation/H(+) antiporter 15	NA
cds14489	-1.16647	0.0451089	product=trans-cinnamate 4-monooxygenase	NA
cds14506	-1.32251	0.00349156	product=probable chalcone--flavonone isomerase 3	NA
cds14776	1.60903	0.047774	product=L-ascorbate peroxidase%2C cytosolic	Ascorbate and aldarate metabolism, Phenylpropanoid biosynthesis, Glutathione metabolism
cds14903	1.62449	0.00290601	product=histone H2B.11	NA
cds14927	1.22218	4.05728e-13	product=heat shock cognate 70 kDa protein 2	NA
cds15097	0.948668	0.00810141	product=18.1 kDa class I heat shock protein	NA
cds1517	1.53432	1.01232e-42	product=uncharacterized protein LOC105049307	NA
cds15257	-1.72338	0.0451089	product=plasma membrane ATPase 3-like	Oxidative phosphorylation, Purine metabolism
cds15463	1.44366	0.00931268	product=early light-induced protein 1%2C chloroplastic	NA
cds16317	1.06811	0.010167	product=protein DEHYDRATION-INDUCED 19	NA
cds16700	2.33245	0.00715377	product=jasmonic acid-amido synthetase JAR1	NA
cds17227	1.36997	0.00185624	product=polyadenylate-binding protein 2	NA
cds17320	1.41105	0.0330287	product=uncharacterized protein LOC105047980	NA
cds17369	-3.15518	0.00167927	product=RGG repeats nuclear RNA binding protein A	NA
cds1745	-1.58893	0.020444	product=heavy metal-associated isoprenylated plant protein 37-like	NA
cds18319	1.78142	4.16973e-24	product=inositol-3-phosphate synthase	NA
cds18355	-2.74289	0.00782054	product=homeobox-leucine zipper protein HOX21	NA
cds18906	-1.67016	0.00931268	product=uncharacterized protein LOC105049237	NA
cds19459	-0.929198	0.0497465	product=stearoyl-[acyl-carrier-protein] 9-desaturase%2C chloroplastic-like	Fatty acid biosynthesis
cds20622	-1.3362	0.013067	product=ADP%2CATP carrier protein 1%2C mitochondrial	NA
cds2083	1.3324	2.7501e-10	product=polyubiquitin 11	NA
cds21009	0.438898	4.43156e-05	product=uncharacterized protein LOC105050802	NA
cds21537	2.78359	4.73294e-06	product=probably inactive leucine-rich repeat receptor-like protein kinase At3g28040	NA
cds21982	-1.25402	0.0429596	product=60S ribosomal protein L5	NA
cds22310	-1.07256	4.73145e-07	product=receptor-like protein kinase	NA
cds22529	-2.33397	0.00810141	product=cellulose synthase-like protein H1	NA
cds22608	0.854046	0.000571608	product=knob-associated histidine-rich protein-like	NA
cds2291	-1.11179	0.0446276	product=elongation factor 1-gamma 2	NA
cds23434	-1.61898	0.0144301	product=universal stress protein PHOS32	NA
cds23504	-2.48067	0.000131827	product=late embryogenesis abundant protein Lea5-D	NA
cds23630	-1.99228	0.00164348	product=uncharacterized protein LOC105053275	NA
cds24306	-0.524429	0.00782054	product=YTH domain-containing family protein 1	NA
cds24861	2.01992	9.13306e-08	product=leucoanthocyanidin dioxygenase-like	NA
cds24888	1.78766	0.00896592	product=40S ribosomal protein S17	NA
cds25485	2.89618	0.00227892	product=abscisic acid receptor PYR1	NA
cds25624	1.22861	0.00810141	product=probable aquaporin PIP2-6	NA
cds25661	-1.41064	0.0325894	product=actin-depolymerizing factor 5	NA
cds2572	-1.03665	0.00934122	product=uncharacterized protein LOC105054863	NA
cds25844	-1.45792	0.0265243	product=60S ribosomal protein L44	NA
cds25933	-1.15227	0.0175229	product=60S ribosomal protein L24	NA
cds26002	-1.5748	9.73676e-13	product=naringenin%2C2-oxoglutarate 3-dioxygenase	NA
cds26012	2.88716	0.00297907	product=probable linoleate 9S-lipoxygenase 5	NA
cds26082	2.35176	0.0170805	product=heat shock protein 83-like	NA
cds26342	0.494901	0.0446276	product=probable polygalacturonase	Pentose and glucuronate interconversions
cds26599	-1.98932	7.01442e-05	product=transcription factor bHLH93	NA
cds26665	-1.72067	0.00607568	product=probable flavin-containing monooxygenase 1	NA
cds27419	2.59268	1.29879e-05	product=NADH dehydrogenase [ubiquinone] 1 alpha subcomplex subunit 13-B	NA
cds27465	-1.25342	3.88082e-05	product=phenylalanine ammonia-lyase	Phenylalanine metabolism
cds27668	-1.14942	0.0170805	product=flavonoid 3'-monooxygenase-like	NA
cds27689	-1.44166	0.0122438	product=40S ribosomal protein S19-3	NA
cds27764	1.67144	0.00290601	product=protein PYRICULARIA ORYZAE RESISTANCE 21	NA
cds28254	-2.89445	5.59081e-17	product=myb-related protein Myb4-like	NA
cds28306	-3.70358	0.0107064	product=uncharacterized protein LOC105056478	NA
cds28388	-1.14954	0.04159	product=40S ribosomal protein S9-2	NA
cds28788	0.706889	0.047774	product=PLAT domain-containing protein 3-like	NA
cds28916	1.34819	1.77311e-11	product=histone H2B-like	NA
cds28925	1.99004	2.9632e-09	product=histone H2B.11-like	NA
cds29078	-1.25321	0.00349156	product=elongation factor 1-alpha	NA
cds29440	2.67528	0.0031811	product=ubiquitin-40S ribosomal protein S27a-like	NA
cds29775	-0.748681	0.03172	product=elongation factor 1-beta-like	NA
cds300	-1.89692	0.0142576	product=eukaryotic translation initiation factor 5B-like	NA
cds30141	-3.061	0.047774	product=uncharacterized protein LOC105057911	NA
cds30313	-2.08713	0.0364385	product=uncharacterized protein LOC105058033	NA
cds30491	0.893349	0.00911105	product=glycine-rich RNA-binding protein GRP2A	NA
cds30509	-0.993959	0.00175761	product=tubulin alpha chain	NA
cds30787	1.09284	0.0446276	product=uncharacterized protein LOC105058394	NA
cds3124	-1.68853	0.010167	product=leucine-rich repeat receptor-like protein kinase PXC1	NA
cds31357	-1.40906	0.0105446	product=60S ribosomal protein L23	NA
cds31448	-1.016	0.000159379	product=ABC transporter F family member 1	NA
cds31469	4.00879	0.0446276	product=early nodulin-75-like	NA
cds31568	1.26686	3.06777e-05	product=probable aquaporin PIP1-2	NA
cds31643	1.2715	0.030558	product=stem-specific protein TSJT1-like	Alanine, aspartate and glutamate metabolism
cds31786	-1.1275	2.11732e-07	product=glutathione S-transferase F12	NA
cds31815	1.23016	0.0256106	product=histone H4	NA
cds31921	0.729054	0.036058	product=heat stress transcription factor B-2b-like	NA
cds32043	-1.89409	4.11281e-07	product=naringenin%2C2-oxoglutarate 3-dioxygenase	NA
cds32229	1.42954	0.0189612	product=LOW QUALITY PROTEIN: protein LHY-like	NA
cds32233	-2.4065	0.00627507	product=protein NTM1-like 9	NA
cds32326	0.638039	0.0265157	product=peptidyl-prolyl cis-trans isomerase CYP19-1	NA
cds32336	1.73464	0.00851934	product=endoplasmin homolog	NA
cds33128	-1.94225	0.00490567	product=CHD3-type chromatin-remodeling factor PICKLE	NA
cds33327	-1.29292	0.0107064	product=40S ribosomal protein S27-2	NA
cds33340	1.33206	3.20081e-14	product=chalcone synthase 1-like	Flavonoid biosynthesis
cds35118	-1.5132	0.00185624	product=probable nucleolar protein 5-2	NA
cds35164	1.57419	6.78467e-06	product=probable glutathione S-transferase GSTF1	Metabolism of xenobiotics by cytochrome P450, Drug metabolism - other enzymes, Drug metabolism - cytochrome P450
cds35508	-1.28654	0.0105446	product=60S ribosomal protein L32-1	NA
cds35952	-3.30649	0.00627507	product=internal alternative NAD(P)H-ubiquinone oxidoreductase A1%2C mitochondrial	NA
cds36366	0.757257	0.0383964	product=histone H1-like	NA
cds36448	-2.27223	0.00167094	product=exportin-7-B-like	NA
cds36494	-2.30348	0.0003905	product=putative quinone-oxidoreductase homolog%2C chloroplastic	NA
cds36510	-2.12718	8.62594e-05	product=FHA domain-containing protein FHA2	NA
cds36564	-0.685128	0.0388976	product=transcription repressor MYB5-like	NA
cds37237	1.5567	0.0399578	product=SAGA-associated factor 29	NA
cds37383	3.9157	0.0451089	product=large proline-rich protein BAG6	NA
cds37412	-1.95971	0.000342712	product=60S acidic ribosomal protein P2B	NA
cds37479	-1.2933	2.80462e-19	product=uncharacterized protein LOC109505017	NA
cds3792	1.93774	0.00422214	product=fructokinase-1	Neomycin, kanamycin and gentamicin biosynthesis, Fructose and mannose metabolism, Glycolysis / Gluconeogenesis, Galactose metabolism, Starch and sucrose metabolism, Streptomycin biosynthesis, Amino sugar and nucleotide sugar metabolism
cds37955	0.769618	0.0133255	product=dnaJ protein homolog	NA
cds38145	-1.83742	0.00603458	product=DNA ligase 1-like	NA
cds38314	-2.17791	0.03172	product=wall-associated receptor kinase-like 14	NA
cds39368	1.1087	0.0451089	product=5-methyltetrahydropteroyltriglutamate--homocysteine methyltransferase 1	One carbon pool by folate, Selenocompound metabolism, Cysteine and methionine metabolism
cds39436	-2.353	0.0051029	product=uncharacterized protein LOC105035433	Pentose phosphate pathway, Biosynthesis of antibiotics
cds39942	0.500653	0.0330287	product=leucoanthocyanidin dioxygenase-like	NA
cds40107	-1.20662	0.000378316	product=chalcone--flavonone isomerase	NA
cds40186	-2.15734	0.0399578	product=uncharacterized protein LOC105036053	NA
cds40239	0.974942	0.0388976	product=polyphenol oxidase%2C chloroplastic-like	NA
cds40426	-0.789961	0.000111395	product=uncharacterized protein LOC109505207	NA
cds41430	-1.73965	0.00486689	product=60S ribosomal protein L29-1-like	Biosynthesis of unsaturated fatty acids, alpha-Linolenic acid metabolism, Fatty acid degradation
cds41563	4.03245	5.53342e-08	product=BURP domain-containing protein 6-like	NA
cds41802	0.971179	0.013324	product=maturase K	NA
cds41803	-0.574739	0.00051017	product=ribosomal protein S16	NA
cds41807	-1.45775	9.38424e-12	product=ATP synthase CF0 subunit I	NA
cds41816	5.24876	0.00466487	product=photosystem II protein D2	NA
cds41852	1.43073	0.0489813	product=cytochrome b6/f complex subunit IV	NA
cds41854	-2.80511	4.96838e-108	product=ribosomal protein S11	NA
cds41855	-1.3597	0.0446276	product=ribosomal protein L36	NA
cds41857	0.912173	9.82956e-06	product=ribosomal protein S8	NA
cds41858	-1.13837	2.63149e-05	product=ribosomal protein L14	NA
cds41859	-1.04233	1.28676e-12	product=50S ribosomal protein L16	NA
cds41860	-0.590684	0.0497465	product=ribosomal protein S3	NA
cds41861	-1.28177	5.79364e-12	product=50S ribosomal protein L22	NA
cds41862	-0.993529	6.78467e-06	product=ribosomal protein S19	NA
cds41880	0.31669	0.0268882	product=hypothetical protein RF1	NA
cds41886	-1.18015	5.10097e-08	product=ribosomal protein S19	NA
cds4405	-3.23196	8.03237e-134	product=probable splicing factor 3A subunit 1	NA
cds4452	2.69359	0.0288146	product=probable E3 ubiquitin-protein ligase ARI8	NA
cds4752	2.34846	0.0334058	product=transcription factor VIP1	NA
cds5120	1.8295	0.00715377	product=inositol transporter 1-like	NA
cds5127	-0.951533	0.0388976	product=extracellular ribonuclease LE	NA
cds5147	-2.81155	4.43156e-05	product=proteasome subunit beta type-5-like	NA
cds5387	2.19412	0.0399578	product=adenosylhomocysteinase	NA
cds5487	-1.24605	0.0399578	product=65-kDa microtubule-associated protein 1	NA
cds5948	2.3794	0.000111395	product=plasma membrane ATPase	NA
cds6019	1.59084	0.0364385	product=allene oxide synthase 2-like	NA
cds6535	-3.21588	0.034853	product=LOW QUALITY PROTEIN: RNA polymerase I termination factor	NA
cds6727	-1.59231	0.0151902	product=60S ribosomal protein L22-2	NA
cds677	-1.31586	7.77982e-05	product=ketol-acid reductoisomerase%2C chloroplastic	Pantothenate and CoA biosynthesis, Valine, leucine and isoleucine biosynthesis
cds7128	2.17431	0.0122438	product=embryo-specific protein ATS3B	NA
cds7157	-1.75893	0.0334058	product=transcription factor HY5	NA
cds7348	1.38156	0.0429596	product=protein GIGANTEA	NA
cds7766	-2.52102	4.88549e-05	product=transcription repressor OFP7-like	NA
cds8343	-1.09132	2.7501e-10	product=trans-resveratrol di-O-methyltransferase-like	NA
cds8385	2.35386	0.00736146	product=mitogen-activated protein kinase 10	mTOR signaling pathway
cds8759	1.88731	0.000111395	product=16.9 kDa class I heat shock protein 2	NA
cds8928	-1.4374	0.000263696	product=probable BOI-related E3 ubiquitin-protein ligase 2	NA
cds9134	3.06274	3.44447e-12	product=inositol-3-phosphate synthase-like	Inositol phosphate metabolism
cds9212	-1.38699	0.024606	product=uncharacterized protein OsI_027940	NA

## Sheet: Inflo.6T WA and Inflo.2C NA2
gene	log2FoldChange	padj	product	Pathway
cds10415	1.78239	0.00145642	product=dehydrin COR410-like	NA
cds10499	5.27286	3.49008e-47	product=small heat shock protein%2C chloroplastic-like	NA
cds10500	10.1444	1.70381e-10	product=small heat shock protein%2C chloroplastic-like	NA
cds10571	2.81645	0.00332148	product=osmotin-like protein	NA
cds10573	4.20434	3.63624e-44	product=heat shock cognate 70 kDa protein 2-like	NA
cds10754	0.866442	0.000165341	product=probable aquaporin PIP1-2	NA
cds11113	2.33553	7.57776e-11	product=chaperonin CPN60-2%2C mitochondrial	NA
cds11468	3.0329	0.00112506	product=heat stress transcription factor B-2c-like	NA
cds11619	4.18703	3.22713e-08	product=hsp70-Hsp90 organizing protein	NA
cds11780	1.35599	0.00535248	product=PLAT domain-containing protein 3-like	NA
cds11792	0.825262	0.0224827	product=expansin-B5	NA
cds11959	-1.65564	0.0487531	product=LOW QUALITY PROTEIN: uncharacterized protein LOC105043887	NA
cds1199	7.66809	1.69657e-05	product=dnaJ homolog subfamily B member 13-like	NA
cds12199	4.56869	0.0383696	product=RNA-binding protein 39	NA
cds12213	2.01386	0.0165289	product=probable aquaporin PIP2-6	NA
cds12245	-1.52858	0.0224713	product=myb-related protein 308-like	NA
cds12409	-1.9335	0.0249153	product=eukaryotic translation initiation factor	NA
cds12562	1.69999	0.00277269	product=malate dehydrogenase	Pyruvate metabolism, Citrate cycle (TCA cycle), Biosynthesis of antibiotics, Cysteine and methionine metabolism, Methane metabolism, Carbon fixation pathways in prokaryotes, Carbon fixation in photosynthetic organisms, Glyoxylate and dicarboxylate metabolism
cds12684	0.888292	9.15612e-08	product=metallothionein-like protein type 2	NA
cds12685	4.69135	0.0322317	product=metallothionein-like protein type 2	NA
cds12708	1.00192	3.28258e-05	product=probable mediator of RNA polymerase II transcription subunit 37c	NA
cds12896	1.59878	0.00112506	product=L-ascorbate peroxidase%2C cytosolic	NA
cds13044	3.27116	6.86751e-05	product=dnaJ protein ERDJ3A	NA
cds13049	6.32002	0.000973819	product=pyruvate decarboxylase 1	NA
cds13097	2.50827	0.0155056	product=uncharacterized protein At5g01610	NA
cds13429	-1.86607	0.0052852	product=LOW QUALITY PROTEIN: uncharacterized protein LOC105044933	NA
cds13446	1.02232	0.0401228	product=ubiquitin-40S ribosomal protein S27a	NA
cds13583	2.69696	0.00291663	product=universal stress protein A-like protein	NA
cds13622	-1.06846	3.14393e-16	product=polyphenol oxidase%2C chloroplastic-like	NA
cds13699	1.94721	0.000452217	product=late embryogenesis abundant protein Lea5-like	NA
cds13758	2.14851	0.0255586	product=40S ribosomal protein S21	NA
cds13911	-1.50169	6.20298e-05	product=glucan endo-1%2C3-beta-glucosidase	NA
cds14056	6.17645	0.00402406	product=10 kDa chaperonin%2C mitochondrial	NA
cds14131	5.13374	0.0165339	product=uncharacterized protein At3g03773	NA
cds14210	-2.39727	0.044085	product=suppressor of mec-8 and unc-52 protein homolog 2	NA
cds1451	7.39027	3.42839e-16	product=18.1 kDa class I heat shock protein-like	NA
cds14919	2.77342	1.01225e-63	product=probable mediator of RNA polymerase II transcription subunit 37c	NA
cds15097	5.38182	6.86724e-37	product=18.1 kDa class I heat shock protein	NA
cds1510	7.69199	1.44657e-05	product=chaperone protein DnaJ-like isoform X1	NA
cds15114	3.99398	8.22929e-05	product=serine/arginine-rich splicing factor SR45a isoform X1	NA
cds1517	-0.988271	6.37166e-06	product=uncharacterized protein LOC105049307	NA
cds15463	2.93275	2.06378e-10	product=early light-induced protein 1%2C chloroplastic	NA
cds15853	1.22448	0.00380656	product=polyubiquitin 11	NA
cds15996	4.47727	0.00112229	product=DNA-damage-repair/toleration protein DRT102-like	NA
cds16308	6.35854	1.01757e-07	product=dnaJ homolog subfamily B member 13-like	NA
cds16522	9.90573	5.09902e-10	product=chaperone protein ClpB1-like	NA
cds16666	-1.4435	8.22929e-05	product=acidic endochitinase	NA
cds17133	2.36014	0.00369315	product=3-ketoacyl-CoA synthase 11	NA
cds17200	2.92824	5.68933e-21	product=heat shock 70 kDa protein 14-like	NA
cds17264	5.10569	8.49786e-26	product=17.3 kDa class II heat shock protein-like	NA
cds17320	-1.7041	0.0385541	product=uncharacterized protein LOC105047980	NA
cds17448	2.13334	0.0134675	product=citrate synthase%2C glyoxysomal-like	NA
cds17554	-1.68725	0.00716897	product=GDSL esterase/lipase At5g45910	NA
cds17665	7.998	1.85909e-25	product=BAG family molecular chaperone regulator 6-like	NA
cds17666	8.70674	1.3631e-07	product=uncharacterized protein LOC109506047	NA
cds17876	-1.50246	8.4351e-09	product=GDP-L-galactose phosphorylase 1-like isoform X3	Starch and sucrose metabolism
cds18007	3.07559	0.0013767	product=tetraketide alpha-pyrone reductase 2	NA
cds18067	10.3398	6.02786e-11	product=16.9 kDa class I heat shock protein 2-like	NA
cds18069	9.20958	6.68688e-09	product=18.1 kDa class I heat shock protein	NA
cds18212	-0.722641	0.000343908	product=leucine-rich repeat extensin-like protein 4	NA
cds18270	1.89253	0.000452217	product=phospho-2-dehydro-3-deoxyheptonate aldolase 2%2C chloroplastic	Phenylalanine, tyrosine and tryptophan biosynthesis
cds18319	1.64857	1.42297e-15	product=inositol-3-phosphate synthase	Streptomycin biosynthesis
cds18385	7.40837	0.000165341	product=E3 ubiquitin-protein ligase RING1-like	NA
cds18398	-2.92195	0.00716897	product=EG45-like domain containing protein	NA
cds18406	3.79707	1.22891e-08	product=protein BOBBER 1	NA
cds18593	4.62339	0.0409061	product=PHD finger-like domain-containing protein 5B	Pentose phosphate pathway, Fructose and mannose metabolism
cds18724	-3.3393	0.0100933	product=protein LATERAL ROOT PRIMORDIUM 1-like	NA
cds18839	-2.66522	0.0334998	product=berberine bridge enzyme-like 18	NA
cds18882	-1.17976	0.0130026	product=myosin-9-like	NA
cds18906	-2.46913	0.0364762	product=uncharacterized protein LOC105049237	NA
cds18924	-2.5045	0.0048828	product=7-deoxyloganetin glucosyltransferase-like	NA
cds18974	-5.10299	0.0385449	product=uncharacterized protein LOC105049306	NA
cds19291	4.37981	0.000639972	product=chaperone protein ClpB3%2C mitochondrial	NA
cds19962	1.09219	6.30684e-05	product=heat shock protein 81-1	NA
cds20167	-1.90774	0.00627408	product=probable plastid-lipid-associated protein 2%2C chloroplastic	NA
cds20189	2.72811	0.00583259	product=omega-6 fatty acid desaturase%2C endoplasmic reticulum isozyme 2-like	NA
cds20229	-1.54406	0.00429241	product=probable polygalacturonase	NA
cds20622	2.16494	0.013361	product=ADP%2CATP carrier protein 1%2C mitochondrial	NA
cds20728	6.50031	5.68531e-08	product=18.1 kDa class I heat shock protein	NA
cds20729	9.36192	6.68688e-09	product=18.1 kDa class I heat shock protein	NA
cds2083	0.807055	7.18116e-06	product=polyubiquitin 11	NA
cds20880	3.13945	4.1885e-06	product=temperature-induced lipocalin-1	NA
cds20910	8.21891	5.76467e-07	product=heat shock 70 kDa protein-like	NA
cds21009	-1.22918	1.18131e-41	product=uncharacterized protein LOC105050802	NA
cds21149	5.05863	3.62504e-10	product=uncharacterized protein LOC105050886	NA
cds21216	6.03605	0.00114314	product=uncharacterized protein LOC105050969	NA
cds21397	7.19273	3.70438e-20	product=calponin homology domain-containing protein DDB_G0272472	NA
cds2155	1.34209	0.0378839	product=B2 protein	NA
cds21737	2.76221	2.6643e-11	product=stromal 70 kDa heat shock-related protein%2C chloroplastic	NA
cds21937	-1.3452	0.00112506	product=endochitinase EP3-like	NA
cds21939	-0.990569	0.00583259	product=chitinase 6-like	NA
cds22310	-0.509989	0.0201503	product=receptor-like protein kinase	NA
cds22608	0.592023	0.0201503	product=knob-associated histidine-rich protein-like	NA
cds22687	2.30075	2.68155e-05	product=uncharacterized protein LOC105052114 isoform X2	NA
cds22865	7.09612	0.00138388	product=heat shock cognate 70 kDa protein 2-like	NA
cds23367	4.38351	0.00205142	product=glucose-6-phosphate/phosphate translocator 2%2C chloroplastic	NA
cds23463	2.81179	0.0490054	product=uncharacterized protein LOC105052568	NA
cds23499	-2.22572	0.0468663	product=glyoxysomal fatty acid beta-oxidation multifunctional protein MFP-a	NA
cds23713	2.90313	6.56142e-05	product=heat shock 70 kDa protein%2C mitochondrial	NA
cds23805	-2.01455	0.00040382	product=xyloglucan endotransglucosylase/hydrolase protein 22	NA
cds23985	2.84204	0.040294	product=20 kDa chaperonin%2C chloroplastic	NA
cds24177	3.26311	1.80943e-06	product=16.0 kDa heat shock protein%2C peroxisomal	NA
cds24268	1.78319	1.36335e-08	product=5-methyltetrahydropteroyltriglutamate--homocysteine methyltransferase 2-like	Selenocompound metabolism
cds24299	2.91925	0.0314271	product=T-complex protein 1 subunit theta	NA
cds24306	0.59842	0.0453195	product=YTH domain-containing family protein 1	NA
cds24535	5.61426	1.46906e-08	product=BI1-like protein	NA
cds24676	-2.8326	4.13081e-05	product=thaumatin-like protein 1b	NA
cds24677	-3.13234	2.34761e-16	product=thaumatin-like protein 1b	NA
cds24834	2.78489	0.000387555	product=DNA-binding protein SMUBP-2	NA
cds24861	1.31636	2.99217e-05	product=leucoanthocyanidin dioxygenase-like	NA
cds25081	6.85454	0.00112229	product=heat stress transcription factor B-2c	NA
cds25213	2.72488	1.47508e-10	product=hsp70-Hsp90 organizing protein	NA
cds2537	-5.22263	0.0227712	product=succinate--CoA ligase [ADP-forming] subunit alpha%2C mitochondrial	NA
cds25393	-2.59388	0.00623546	product=glutamate dehydrogenase 2%2C mitochondrial	NA
cds25495	3.87565	0.0234335	product=uncharacterized protein LOC105053857	NA
cds2556	-3.29549	0.0193877	product=LOW QUALITY PROTEIN: uncharacterized protein LOC105054732	NA
cds25709	-0.898501	5.13212e-09	product=calcium-dependent protein kinase 18	NA
cds26081	6.36508	6.43505e-74	product=heat shock protein 83	NA
cds26082	5.22305	1.42942e-28	product=heat shock protein 83-like	NA
cds26268	1.58648	0.00308327	product=luminal-binding protein 4	NA
cds26283	1.07534	2.97664e-06	product=catalase isozyme 2	Phenylpropanoid biosynthesis, Tryptophan metabolism
cds26342	-1.05975	1.63519e-06	product=probable polygalacturonase	Pentose and glucuronate interconversions
cds26450	-3.48888	0.00816204	product=WEB family protein At3g02930%2C chloroplastic	NA
cds26496	0.825973	0.00810045	product=endoplasmin homolog	NA
cds26771	3.90363	0.0224713	product=protein CCA1	NA
cds26972	3.63055	0.0272808	product=uncharacterized protein LOC105055449	NA
cds27302	2.85932	0.0367272	product=60S ribosomal protein L21-1-like	NA
cds27419	-1.39821	0.00145642	product=NADH dehydrogenase [ubiquinone] 1 alpha subcomplex subunit 13-B	NA
cds27465	0.918053	0.000444561	product=phenylalanine ammonia-lyase	Phenylalanine metabolism
cds27668	2.79145	5.26229e-06	product=flavonoid 3'-monooxygenase-like	NA
cds27764	-0.682267	0.0135344	product=protein PYRICULARIA ORYZAE RESISTANCE 21	NA
cds27914	5.62353	0.00307728	product=probable indole-3-acetic acid-amido synthetase GH3.8	NA
cds28356	-4.12301	0.0115675	product=putative laccase-9	NA
cds28384	-2.82848	0.0180438	product=F-box/kelch-repeat protein SKIP11-like	NA
cds28453	5.27371	0.0138465	product=60S ribosomal protein L34	NA
cds28850	1.98897	0.00709786	product=histone H4	NA
cds28853	-2.07288	0.043376	product=calcium-transporting ATPase 4%2C endoplasmic reticulum-type-like	NA
cds28916	-0.862396	0.00166847	product=histone H2B-like	NA
cds28952	6.06707	6.29585e-64	product=probable mediator of RNA polymerase II transcription subunit 37c	NA
cds28970	1.10248	0.000982732	product=metallothionein-like protein type 2	NA
cds29078	-1.14608	0.0375218	product=elongation factor 1-alpha	NA
cds29328	1.41915	0.017736	product=60S ribosomal protein L10	NA
cds29352	3.67956	0.0140091	product=LOW QUALITY PROTEIN: 2%2C3-bisphosphoglycerate-independent phosphoglycerate mutase-like	NA
cds29429	-1.58431	4.49399e-08	product=S-adenosylmethionine synthase	NA
cds29747	4.57182	3.23691e-30	product=polyubiquitin	NA
cds29776	-1.03746	0.00991413	product=nucleolar protein 56	NA
cds29827	1.71743	0.0256868	product=protein DELETION OF SUV3 SUPPRESSOR 1(I)	NA
cds30141	1.73236	0.0165233	product=uncharacterized protein LOC105057911	NA
cds30335	5.25036	0.0282577	product=probable indole-3-acetic acid-amido synthetase GH3.1	NA
cds30555	2.90402	0.0048828	product=probable zinc metallopeptidase EGY3%2C chloroplastic	NA
cds30806	1.97635	0.0399469	product=annexin D1	NA
cds30853	1.51383	0.00623546	product=phospho-2-dehydro-3-deoxyheptonate aldolase 1%2C chloroplastic	NA
cds31282	-0.87339	0.00223114	product=LOW QUALITY PROTEIN: uncharacterized protein LOC105058786	NA
cds31568	0.93796	0.0131649	product=probable aquaporin PIP1-2	NA
cds31786	1.71474	6.20298e-05	product=glutathione S-transferase F12	NA
cds31997	1.78067	2.97536e-09	product=histone H1-like	NA
cds32043	1.55067	0.0364762	product=naringenin%2C2-oxoglutarate 3-dioxygenase	NA
cds32076	5.90312	8.51751e-10	product=bax inhibitor 1	NA
cds32128	5.35852	7.64669e-78	product=heat shock protein 83	NA
cds32220	-2.79907	0.0140091	product=homeobox protein BEL1 homolog	NA
cds32326	-0.640362	0.0113703	product=peptidyl-prolyl cis-trans isomerase CYP19-1	NA
cds32432	-1.8626	0.0318789	product=chitinase 1-like	Amino sugar and nucleotide sugar metabolism
cds32434	-3.74041	2.82385e-25	product=chitinase 1	NA
cds32724	-2.53261	0.0387377	product=polygalacturonase QRT3-like	NA
cds32951	5.82885	0.00736934	product=E3 ubiquitin-protein ligase RNF185	NA
cds32983	-2.31481	1.69377e-88	product=pathogenesis-related protein PRB1-3-like	NA
cds32984	-3.49696	1.39553e-11	product=pathogenesis-related protein PRB1-3-like	NA
cds32985	-4.05164	3.08701e-15	product=pathogenesis-related protein PRB1-3-like	NA
cds33322	0.916566	0.00307728	product=calnexin homolog	NA
cds33340	0.861087	0.000236517	product=chalcone synthase 1-like	NA
cds33522	4.73141	0.0402563	product=uncharacterized protein LOC105060513	NA
cds33599	-1.22118	0.00288828	product=homeobox-leucine zipper protein HOX20-like	NA
cds33692	2.19018	1.46993e-05	product=ruBisCO large subunit-binding protein subunit beta%2C chloroplastic	NA
cds33697	-2.29701	0.0083788	product=isoflavone reductase-like protein	NA
cds34529	-2.81177	0.0459304	product=acyl-CoA-binding protein	NA
cds3469	-3.29798	0.0401228	product=sphingosine kinase 1 isoform X1	Nicotinate and nicotinamide metabolism
cds34788	1.77951	0.0308138	product=ribosomal RNA-processing protein 14-C	NA
cds34925	-3.57706	3.19502e-05	product=alpha carbonic anhydrase 7-like	NA
cds35164	1.00123	7.18116e-06	product=probable glutathione S-transferase GSTF1	NA
cds35361	7.61506	8.75205e-05	product=heat shock 70 kDa protein	NA
cds35500	2.36514	2.32874e-28	product=70 kDa peptidyl-prolyl isomerase	NA
cds35550	-1.59797	0.000487262	product=probable linoleate 9S-lipoxygenase 4	NA
cds35587	-3.39514	0.000689658	product=endo-1%2C3%3B1%2C4-beta-D-glucanase	NA
cds36726	-2.04524	0.0135935	product=cysteine proteinase inhibitor 12-like	NA
cds37447	6.21258	0.000926664	product=17.6 kDa class I heat shock protein-like	NA
cds37479	-1.4702	9.4396e-25	product=uncharacterized protein LOC109505017	NA
cds37481	-1.05312	5.99182e-10	product=uncharacterized protein LOC105033943	NA
cds37482	-1.4941	0.000172193	product=uncharacterized protein LOC105033944	NA
cds37483	-1.83551	0.00339131	product=uncharacterized protein LOC109505016	NA
cds37500	-3.37133	1.85789e-13	product=glucan endo-1%2C3-beta-glucosidase-like	NA
cds37522	5.01313	0.0228917	product=26.5 kDa heat shock protein%2C mitochondrial	NA
cds3792	-1.11311	0.00325371	product=fructokinase-1	NA
cds37955	3.16302	5.79559e-50	product=dnaJ protein homolog	NA
cds38208	3.12991	2.05837e-28	product=dnaJ protein homolog	NA
cds38410	5.53823	0.00369315	product=fibrous sheath CABYR-binding protein-like	NA
cds38555	2.00032	0.00736934	product=protein HEAT-STRESS-ASSOCIATED 32	NA
cds39551	1.4322	0.0146417	product=ruBisCO large subunit-binding protein subunit beta%2C chloroplastic	NA
cds39754	-4.83991	0.0487458	product=sulfoquinovosyl transferase SQD2	NA
cds39942	1.58149	1.08362e-10	product=leucoanthocyanidin dioxygenase-like	NA
cds40031	-3.39313	0.0314271	product=probable inositol oxygenase	Inositol phosphate metabolism, Ascorbate and aldarate metabolism
cds40107	0.833281	0.00339131	product=chalcone--flavonone isomerase	NA
cds40156	5.69038	0.00818205	product=UPF0664 stress-induced protein C29B12.11c	NA
cds40206	4.12306	6.37815e-08	product=heat shock 70 kDa protein 8	NA
cds40239	-1.01432	0.00985844	product=polyphenol oxidase%2C chloroplastic-like	Isoquinoline alkaloid biosynthesis, Tyrosine metabolism
cds40420	2.79176	1.38628e-05	product=LOW QUALITY PROTEIN: uncharacterized protein LOC105036288	NA
cds40426	-1.22492	1.41691e-08	product=uncharacterized protein LOC109505207	NA
cds40504	-2.13139	0.0295357	product=uncharacterized protein LOC109505214	NA
cds40532	2.72844	0.0375218	product=uncharacterized protein LOC105036401	NA
cds40692	1.09998	0.000378376	product=heat shock protein 81-1	NA
cds40852	2.96244	0.013673	product=uncharacterized protein LOC105036779	NA
cds40958	-1.44818	0.00497475	product=polyphenol oxidase%2C chloroplastic	NA
cds40991	-2.25785	0.000137533	product=reticuline oxidase	NA
cds41102	-1.26988	1.20945e-06	product=LOW QUALITY PROTEIN: uncharacterized protein LOC109505288	NA
cds41280	-0.920748	0.00145642	product=protein P21-like	NA
cds41407	-1.19477	0.000190675	product=Bowman-Birk type trypsin inhibitor-like	NA
cds41483	7.38963	4.84467e-05	product=uncharacterized protein LOC105037518	NA
cds41674	7.82825	1.17228e-05	product=uncharacterized protein LOC105037740	NA
cds41741	-2.45186	0.043376	product=probable histone H2A.2	NA
cds41802	-1.78654	1.07677e-09	product=maturase K	NA
cds41803	-1.45272	9.74786e-30	product=ribosomal protein S16	NA
cds41807	-1.06191	2.51892e-05	product=ATP synthase CF0 subunit I	NA
cds41808	-1.98247	0.00528056	product=ATP synthase CF0 subunit III	Thiamine metabolism, Purine metabolism
cds41819	-1.3664	2.37826e-12	product=ribosomal protein S14	NA
cds41822	-1.64878	1.1345e-06	product=photosystem I assembly protein ycf3	NA
cds41827	-1.07083	7.68697e-07	product=ATP synthase CF1 epsilon subunit	NA
cds41829	-0.89502	2.91067e-10	product=ribulose bisophosphate carboxylase	NA
cds41830	-1.57008	4.84342e-10	product=acetyl-CoA carboxylase carboxyltransferase beta subunit	NA
cds41846	-1.26735	5.44874e-06	product=clp protease proteolytic subunit	NA
cds41847	-1.08853	0.0151649	product=photosystem II CP47 chlorophyll apoprotein	NA
cds41849	-2.77611	0.00429241	product=photosystem II protein N	NA
cds41850	-2.08967	1.23584e-06	product=photosystem II phosphoprotein	NA
cds41853	-1.22988	0.000473423	product=RNA polymerase alpha subunit	Pyrimidine metabolism
cds41856	-1.8576	6.14859e-19	product=translational initiation factor 1	NA
cds41857	-1.49235	9.84321e-18	product=ribosomal protein S8	NA
cds41858	-0.651529	0.00381642	product=ribosomal protein L14	NA
cds41859	-1.01929	2.01007e-13	product=50S ribosomal protein L16	NA
cds41860	-1.28223	6.33455e-06	product=ribosomal protein S3	NA
cds41861	-1.25545	3.33386e-10	product=50S ribosomal protein L22	NA
cds41862	-1.48335	6.33339e-09	product=ribosomal protein S19	NA
cds41863	-0.695115	0.0334998	product=ribosomal protein L2	NA
cds41866	-1.51292	0.0434243	product=NADH dehydrogenase subunit 2	NA
cds41880	-0.806014	2.3534e-13	product=hypothetical protein RF1	NA
cds41881	-1.22191	0.00583259	product=ribosomal protein S7	NA
cds41885	-0.908331	0.00193797	product=ribosomal protein L2	NA
cds41886	-1.6089	4.95231e-11	product=ribosomal protein S19	NA
cds4295	1.17925	0.00205142	product=extensin-like	NA
cds4405	-0.489859	3.97575e-05	product=probable splicing factor 3A subunit 1	NA
cds4568	2.40258	2.45289e-05	product=histone deacetylase HDT2	NA
cds4570	-1.66076	0.000264386	product=LOW QUALITY PROTEIN: transcriptional activator DEMETER-like	NA
cds5036	6.84433	1.08229e-13	product=22.7 kDa class IV heat shock protein-like	NA
cds5037	9.50269	3.57312e-09	product=22.0 kDa class IV heat shock protein-like	NA
cds5170	8.29683	1.11696e-06	product=LOW QUALITY PROTEIN: heat shock 70 kDa protein 6%2C chloroplastic-like	NA
cds5344	5.37005	0.021781	product=small ubiquitin-related modifier 2	NA
cds5479	1.54727	0.000152065	product=heat shock protein 81-1-like	NA
cds5481	1.41361	0.00277269	product=heat shock protein 81-1	NA
cds5518	-2.36494	2.09239e-05	product=uncharacterized protein LOC105038944	NA
cds5615	-3.83109	0.0333438	product=HSP-interacting protein	NA
cds5651	-2.24622	0.00316083	product=transmembrane 9 superfamily member 11	NA
cds5948	-2.59298	1.32622e-26	product=plasma membrane ATPase	Oxidative phosphorylation
cds6212	-1.29888	2.05151e-20	product=linoleate 13S-lipoxygenase 2-1%2C chloroplastic	NA
cds6292	-1.27395	0.0334419	product=protein TIC 55%2C chloroplastic	Porphyrin and chlorophyll metabolism
cds6653	-2.07852	0.0447508	product=sister-chromatid cohesion protein 3	NA
cds6955	7.47733	0.000385175	product=galactinol synthase 1-like	NA
cds7337	1.5511	0.000459972	product=heat shock 70 kDa protein 14-like	NA
cds7450	7.36158	3.69738e-16	product=17.3 kDa class II heat shock protein-like	NA
cds7451	10.3502	5.86386e-11	product=17.1 kDa class II heat shock protein-like	NA
cds7463	-2.77044	0.0300798	product=probable protein phosphatase 2C 50	Th1 and Th2 cell differentiation, T cell receptor signaling pathway, Aminobenzoate degradation
cds7542	-2.96443	0.0023237	product=protein indeterminate-domain 7	NA
cds8044	5.61217	4.5815e-31	product=BAG family molecular chaperone regulator 6	NA
cds819	6.2266	1.87674e-49	product=chaperone protein ClpB1	NA
cds8682	3.12939	5.26229e-06	product=uncharacterized protein LOC105041198	NA
cds8753	7.66664	9.08839e-12	product=18.1 kDa class I heat shock protein	NA
cds8754	6.65645	2.71959e-17	product=18.1 kDa class I heat shock protein-like	NA
cds8755	8.52835	7.71041e-15	product=16.9 kDa class I heat shock protein 2-like	NA
cds8758	8.90686	6.37815e-08	product=17.6 kDa class I heat shock protein-like	NA
cds8759	5.7446	1.56639e-39	product=16.9 kDa class I heat shock protein 2	NA
cds9212	1.55731	0.00166664	product=uncharacterized protein OsI_027940	NA
cds9314	1.78544	0.0432394	product=protein BOBBER 1	NA
cds9461	4.80746	0.000376788	product=uncharacterized protein LOC105041882	NA
cds9493	4.01178	0.0133806	product=universal stress protein PHOS32	NA
cds9526	3.12694	0.000747742	product=phospho-2-dehydro-3-deoxyheptonate aldolase 2%2C chloroplastic-like	NA
cds9605	1.25875	0.0449128	product=ethylene-responsive transcription factor 1	NA
cds9632	7.68856	8.01532e-12	product=17.4 kDa class III heat shock protein	NA
cds9780	-0.730327	0.00435902	product=pathogenesis-related protein PR-4-like	NA
cds9817	2.43889	0.00353812	product=uncharacterized protein LOC105042213	NA

## Sheet: Inflo.6T WA and Inflo.2C NA1
gene	log2FoldChange	padj	product	Pathway
cds10396	-2.99609	0.0138493	product=prolyl endopeptidase	NA
cds10415	2.58492	0.00229862	product=dehydrin COR410-like	NA
cds10499	5.1468	1.04476e-28	product=small heat shock protein%2C chloroplastic-like	NA
cds10500	9.28243	1.17493e-08	product=small heat shock protein%2C chloroplastic-like	NA
cds10573	3.17301	3.56813e-27	product=heat shock cognate 70 kDa protein 2-like	NA
cds10754	0.943695	0.000591183	product=probable aquaporin PIP1-2	NA
cds11113	2.21047	4.59075e-07	product=chaperonin CPN60-2%2C mitochondrial	NA
cds11388	-1.20916	0.0177343	product=LOW QUALITY PROTEIN: subtilisin-like protease SBT1.3	NA
cds11468	2.58834	0.0218972	product=heat stress transcription factor B-2c-like	NA
cds11619	2.91092	8.49287e-05	product=hsp70-Hsp90 organizing protein	NA
cds1199	3.77997	0.00308822	product=dnaJ homolog subfamily B member 13-like	NA
cds12245	-2.24679	0.000230715	product=myb-related protein 308-like	NA
cds12409	-2.10651	0.0238345	product=eukaryotic translation initiation factor	NA
cds12708	1.02232	0.000492709	product=probable mediator of RNA polymerase II transcription subunit 37c	NA
cds12799	-5.38431	0.0432113	product=ABC transporter B family member 20-like	NA
cds13044	2.40574	0.0104941	product=dnaJ protein ERDJ3A	NA
cds13221	-3.26061	0.0178347	product=expansin-A2-like	NA
cds13429	-1.87998	0.0134076	product=LOW QUALITY PROTEIN: uncharacterized protein LOC105044933	NA
cds13430	-1.11579	0.000303487	product=S-adenosylmethionine synthase	NA
cds13699	-1.36401	0.000453401	product=late embryogenesis abundant protein Lea5-like	NA
cds1398	-3.25549	0.0246619	product=LOW QUALITY PROTEIN: myb-related protein 305-like	NA
cds14131	5.71578	0.00778102	product=uncharacterized protein At3g03773	NA
cds14411	-1.0048	1.39626e-08	product=cation/H(+) antiporter 15	NA
cds14489	3.92156	0.00477319	product=trans-cinnamate 4-monooxygenase	NA
cds14506	2.80039	0.0247843	product=probable chalcone--flavonone isomerase 3	NA
cds1451	6.52818	1.7177e-12	product=18.1 kDa class I heat shock protein-like	NA
cds14919	2.16574	3.27961e-35	product=probable mediator of RNA polymerase II transcription subunit 37c	NA
cds15097	4.42008	3.27965e-26	product=18.1 kDa class I heat shock protein	NA
cds1510	3.80378	0.00261506	product=chaperone protein DnaJ-like isoform X1	NA
cds15114	3.13174	0.00552774	product=serine/arginine-rich splicing factor SR45a isoform X1	NA
cds1517	-2.14095	5.44288e-28	product=uncharacterized protein LOC105049307	NA
cds15257	-1.54244	0.0135202	product=plasma membrane ATPase 3-like	NA
cds15463	2.54304	3.16865e-06	product=early light-induced protein 1%2C chloroplastic	NA
cds15856	-1.66067	0.0137886	product=thiamine thiazole synthase%2C chloroplastic	NA
cds15989	-3.68057	0.0273403	product=probable protein phosphatase 2C 64	NA
cds15996	4.61667	0.0296864	product=DNA-damage-repair/toleration protein DRT102-like	NA
cds16219	3.64596	0.0197556	product=chlorophyll a-b binding protein of LHCII type 1	NA
cds16308	5.49644	1.18689e-05	product=dnaJ homolog subfamily B member 13-like	NA
cds16522	9.04373	3.19407e-08	product=chaperone protein ClpB1-like	NA
cds16666	2.70692	0.00862635	product=acidic endochitinase	Starch and sucrose metabolism, Cyanoamino acid metabolism, Phenylpropanoid biosynthesis
cds17200	3.58762	2.26696e-15	product=heat shock 70 kDa protein 14-like	NA
cds17264	4.89511	1.16266e-15	product=17.3 kDa class II heat shock protein-like	NA
cds17320	-1.86925	0.0352717	product=uncharacterized protein LOC105047980	NA
cds17665	9.13585	1.39626e-08	product=BAG family molecular chaperone regulator 6-like	NA
cds17666	7.84471	4.85086e-06	product=uncharacterized protein LOC109506047	NA
cds17876	-1.17087	0.000274586	product=GDP-L-galactose phosphorylase 1-like isoform X3	Fructose and mannose metabolism, Amino sugar and nucleotide sugar metabolism
cds17944	-6.37752	0.011361	product=glutamine synthetase cytosolic isozyme 2	NA
cds18007	3.21031	0.0163026	product=tetraketide alpha-pyrone reductase 2	NA
cds18067	9.47781	4.54242e-09	product=16.9 kDa class I heat shock protein 2-like	NA
cds18069	6.3476	8.63935e-16	product=18.1 kDa class I heat shock protein	NA
cds18109	-2.422	0.00227567	product=phospholipase A2-alpha	NA
cds18270	2.68215	0.000642052	product=phospho-2-dehydro-3-deoxyheptonate aldolase 2%2C chloroplastic	Phenylalanine, tyrosine and tryptophan biosynthesis
cds18319	1.58937	2.23651e-10	product=inositol-3-phosphate synthase	Inositol phosphate metabolism, Streptomycin biosynthesis
cds18355	-2.20895	0.00743452	product=homeobox-leucine zipper protein HOX21	NA
cds18385	4.0978	0.024557	product=E3 ubiquitin-protein ligase RING1-like	NA
cds18406	4.93301	0.000136741	product=protein BOBBER 1	NA
cds19291	5.10349	0.0186849	product=chaperone protein ClpB3%2C mitochondrial	NA
cds19962	1.06267	0.00187135	product=heat shock protein 81-1	NA
cds20118	-2.45026	0.0201849	product=probable E3 ubiquitin ligase SUD1	NA
cds20518	-1.80848	0.0391149	product=transcription factor GTE7	NA
cds20728	8.08069	2.2811e-06	product=18.1 kDa class I heat shock protein	NA
cds20729	2.47007	2.97381e-08	product=18.1 kDa class I heat shock protein	NA
cds20910	8.79922	1.03876e-07	product=heat shock 70 kDa protein-like	NA
cds20999	5.02933	0.0212708	product=NADPH--cytochrome P450 reductase	NA
cds21009	-0.762685	2.8284e-14	product=uncharacterized protein LOC105050802	NA
cds21149	4.92949	2.37998e-06	product=uncharacterized protein LOC105050886	NA
cds21177	5.71591	0.0265493	product=uncharacterized protein LOC105050904	NA
cds21216	4.17346	0.00433097	product=uncharacterized protein LOC105050969	NA
cds21397	5.74529	1.62369e-18	product=calponin homology domain-containing protein DDB_G0272472	NA
cds21695	-2.2196	0.0287634	product=uncharacterized protein LOC105051598	NA
cds21737	3.10478	7.47349e-10	product=stromal 70 kDa heat shock-related protein%2C chloroplastic	NA
cds21939	-1.73813	5.32608e-08	product=chitinase 6-like	NA
cds21940	-0.867961	0.046455	product=endochitinase EP3-like	NA
cds22097	4.8266	0.0248665	product=chlorophyll a-b binding protein CP26%2C chloroplastic-like	NA
cds22310	-1.28282	7.83192e-13	product=receptor-like protein kinase	NA
cds22529	-1.83632	0.00299497	product=cellulose synthase-like protein H1	NA
cds22865	6.23408	0.00967524	product=heat shock cognate 70 kDa protein 2-like	NA
cds23376	-2.21064	0.00810842	product=eukaryotic translation initiation factor 3 subunit A	NA
cds23566	-1.65147	0.00175216	product=vesicle-associated membrane protein 724	NA
cds23805	-1.59476	0.0269984	product=xyloglucan endotransglucosylase/hydrolase protein 22	NA
cds24177	5.71988	0.0026223	product=16.0 kDa heat shock protein%2C peroxisomal	NA
cds24191	-2.08693	0.0212708	product=protein TIFY 6b	NA
cds24268	-0.841783	0.00227216	product=5-methyltetrahydropteroyltriglutamate--homocysteine methyltransferase 2-like	One carbon pool by folate, Selenocompound metabolism
cds24275	-3.93852	0.0495158	product=ubiquitin-conjugating enzyme E2 2	NA
cds24535	6.33857	0.000487193	product=BI1-like protein	NA
cds24699	2.11206	0.00299497	product=putative ripening-related protein 2	NA
cds24834	2.11343	0.0265329	product=DNA-binding protein SMUBP-2	NA
cds24861	4.93718	4.20589e-07	product=leucoanthocyanidin dioxygenase-like	NA
cds24895	-4.17842	6.05166e-09	product=heavy metal-associated isoprenylated plant protein 9	NA
cds24992	-1.49525	0.0379577	product=V-type proton ATPase 16 kDa proteolipid subunit	NA
cds25213	2.79965	3.8091e-07	product=hsp70-Hsp90 organizing protein	NA
cds2537	-5.55162	0.0191746	product=succinate--CoA ligase [ADP-forming] subunit alpha%2C mitochondrial	C5-Branched dibasic acid metabolism
cds25709	-1.08235	1.47634e-11	product=calcium-dependent protein kinase 18	NA
cds25823	0.875366	0.046455	product=phenylalanine ammonia-lyase-like	NA
cds26002	2.93961	1.18781e-13	product=naringenin%2C2-oxoglutarate 3-dioxygenase	NA
cds26081	5.3659	2.44509e-56	product=heat shock protein 83	NA
cds26082	4.94622	8.06907e-18	product=heat shock protein 83-like	NA
cds26120	-3.37368	0.00169942	product=protein EXORDIUM-like 3	NA
cds26268	1.51705	0.0273403	product=luminal-binding protein 4	NA
cds26283	0.844232	0.00285103	product=catalase isozyme 2	Tryptophan metabolism, Glyoxylate and dicarboxylate metabolism
cds26342	-1.39149	7.51662e-10	product=probable polygalacturonase	NA
cds26365	1.55134	0.0271431	product=tricetin 3'%2C4'%2C5'-O-trimethyltransferase-like	NA
cds26496	1.93382	1.15592e-06	product=endoplasmin homolog	NA
cds26771	6.06566	0.00817352	product=protein CCA1	NA
cds26972	5.79299	0.0102989	product=uncharacterized protein LOC105055449	NA
cds27465	1.29581	5.5122e-05	product=phenylalanine ammonia-lyase	Phenylalanine metabolism
cds27784	-3.52248	0.00550118	product=flavonol 3-sulfotransferase-like	NA
cds27823	-6.37563	0.00308822	product=protein LONGIFOLIA 1-like	NA
cds27914	6.20469	0.0011238	product=probable indole-3-acetic acid-amido synthetase GH3.8	NA
cds28165	-6.36622	0.000829248	product=non-functional NADPH-dependent codeinone reductase 2	NA
cds28238	-2.46735	0.0164349	product=copper-transporting ATPase PAA2%2C chloroplastic	NA
cds28850	3.58373	0.0156272	product=histone H4	NA
cds28952	4.69829	1.91705e-51	product=probable mediator of RNA polymerase II transcription subunit 37c	NA
cds28970	1.58603	0.000274586	product=metallothionein-like protein type 2	NA
cds29078	-1.42262	0.0110755	product=elongation factor 1-alpha	NA
cds2930	-1.61642	0.00266833	product=UDP-glucose 6-dehydrogenase 5-like	NA
cds29429	-1.6797	6.1544e-08	product=S-adenosylmethionine synthase	Cysteine and methionine metabolism
cds29562	-2.18794	0.0247413	product=40S ribosomal protein S4-3	NA
cds29652	5.09163	0.0156272	product=pathogenesis-related protein 1-like	NA
cds29747	3.27386	1.55834e-19	product=polyubiquitin	NA
cds30078	-3.10189	0.00311735	product=histone H2AX	NA
cds3025	-1.5907	3.19596e-05	product=subtilisin-like protease SBT1.7	NA
cds30335	5.82861	0.0146492	product=probable indole-3-acetic acid-amido synthetase GH3.1	NA
cds30555	6.28779	0.00139946	product=probable zinc metallopeptidase EGY3%2C chloroplastic	NA
cds30853	2.5941	0.00118223	product=phospho-2-dehydro-3-deoxyheptonate aldolase 1%2C chloroplastic	NA
cds30867	-1.83456	0.0299066	product=homeobox-leucine zipper protein HOX20-like	NA
cds3124	-1.73708	0.00207767	product=leucine-rich repeat receptor-like protein kinase PXC1	NA
cds31450	-6.91462	0.00744831	product=indole-3-acetic acid-induced protein ARG7-like	NA
cds31469	3.83615	0.000386589	product=early nodulin-75-like	NA
cds31470	3.27669	0.0484626	product=early nodulin-75-like	NA
cds31582	-5.0997	0.0213343	product=uncharacterized protein LOC105059036	NA
cds31786	2.26732	0.000487193	product=glutathione S-transferase F12	NA
cds31972	2.18002	0.0182678	product=DEAD-box ATP-dependent RNA helicase 7	NA
cds31997	1.41353	8.67803e-05	product=histone H1-like	NA
cds32043	4.27426	0.0464374	product=naringenin%2C2-oxoglutarate 3-dioxygenase	NA
cds32049	-3.89281	6.05166e-09	product=GDP-mannose 4%2C6 dehydratase 1-like	NA
cds32076	5.03936	4.74673e-07	product=bax inhibitor 1	NA
cds32128	2.42019	3.47368e-42	product=heat shock protein 83	NA
cds32288	-3.15919	0.0352717	product=uncharacterized protein LOC105059590	NA
cds32724	-4.14714	5.16568e-05	product=polygalacturonase QRT3-like	NA
cds32951	4.96684	0.0428862	product=E3 ubiquitin-protein ligase RNF185	NA
cds32983	4.66524	5.1222e-25	product=pathogenesis-related protein PRB1-3-like	NA
cds32984	4.59301	0.0320794	product=pathogenesis-related protein PRB1-3-like	NA
cds33322	1.53256	5.3805e-05	product=calnexin homolog	NA
cds33340	1.88785	4.14009e-09	product=chalcone synthase 1-like	Flavonoid biosynthesis
cds33599	-1.32594	0.00308822	product=homeobox-leucine zipper protein HOX20-like	NA
cds33692	2.26173	0.000569923	product=ruBisCO large subunit-binding protein subunit beta%2C chloroplastic	NA
cds33695	5.20581	0.0126678	product=uncharacterized protein LOC105060639	NA
cds33697	-5.4624	6.52529e-16	product=isoflavone reductase-like protein	NA
cds34583	-1.47063	0.0471172	product=ETHYLENE INSENSITIVE 3-like 1 protein	NA
cds34788	2.29771	0.0431258	product=ribosomal RNA-processing protein 14-C	NA
cds34829	-2.8418	0.0464374	product=4-coumarate--CoA ligase-like 4	NA
cds35164	0.95921	0.00027728	product=probable glutathione S-transferase GSTF1	Glutathione metabolism, Drug metabolism - other enzymes, Metabolism of xenobiotics by cytochrome P450, Drug metabolism - cytochrome P450
cds35189	1.62713	0.000591183	product=chlorophyll a-b binding protein of LHCII type 1	NA
cds35361	6.75301	0.00111027	product=heat shock 70 kDa protein	NA
cds35500	2.84664	4.24684e-23	product=70 kDa peptidyl-prolyl isomerase	NA
cds3552	5.02964	0.0144436	product=protein P21-like	NA
cds35587	-2.77686	0.0206306	product=endo-1%2C3%3B1%2C4-beta-D-glucanase	NA
cds35952	-6.14627	0.00103067	product=internal alternative NAD(P)H-ubiquinone oxidoreductase A1%2C mitochondrial	NA
cds36442	-1.58091	0.0113503	product=40S ribosomal protein S2-2-like	NA
cds36447	-3.6411	0.049121	product=protein OBERON 4-like	NA
cds36448	-1.83128	0.00187135	product=exportin-7-B-like	NA
cds36639	-2.30054	0.0257905	product=probable xyloglucan endotransglucosylase/hydrolase protein 28	NA
cds37412	2.38373	0.00752765	product=60S acidic ribosomal protein P2B	NA
cds37447	4.35272	0.00336074	product=17.6 kDa class I heat shock protein-like	NA
cds37479	-1.11312	3.92211e-12	product=uncharacterized protein LOC109505017	NA
cds37481	-1.17926	7.72206e-11	product=uncharacterized protein LOC105033943	Oxidative phosphorylation
cds3792	-1.65006	3.80139e-06	product=fructokinase-1	Neomycin, kanamycin and gentamicin biosynthesis
cds37955	2.37085	4.36937e-27	product=dnaJ protein homolog	NA
cds38208	2.4028	1.2484e-15	product=dnaJ protein homolog	NA
cds38555	2.35914	0.019205	product=protein HEAT-STRESS-ASSOCIATED 32	NA
cds39551	2.89151	0.00172276	product=ruBisCO large subunit-binding protein subunit beta%2C chloroplastic	NA
cds39942	1.92548	1.95088e-09	product=leucoanthocyanidin dioxygenase-like	NA
cds40107	1.73105	5.33912e-07	product=chalcone--flavonone isomerase	NA
cds4012	5.09225	0.0360083	product=phosphoribosylamine--glycine ligase	NA
cds40130	-7.01434	0.00227567	product=cinnamoyl-CoA reductase 1	NA
cds40137	-5.18948	0.0450812	product=uncharacterized protein LOC105036011	NA
cds40206	5.84616	0.00180431	product=heat shock 70 kDa protein 8	NA
cds40420	5.63226	0.00308822	product=LOW QUALITY PROTEIN: uncharacterized protein LOC105036288	NA
cds40426	-1.79876	3.41402e-17	product=uncharacterized protein LOC109505207	NA
cds40501	3.72557	0.000889682	product=chalcone synthase 3-like	NA
cds40601	-1.59362	0.000201822	product=ribosomal protein S2%2C mitochondrial	NA
cds40665	-2.99612	2.68053e-09	product=ABC transporter G family member 36	NA
cds40692	1.63914	3.8324e-05	product=heat shock protein 81-1	NA
cds40958	5.26092	0.00752765	product=polyphenol oxidase%2C chloroplastic	NA
cds40991	-2.35288	0.000212645	product=reticuline oxidase	NA
cds41102	-1.13246	0.000254721	product=LOW QUALITY PROTEIN: uncharacterized protein LOC109505288	NA
cds41126	-6.3749	0.0110755	product=isoflavone reductase homolog A622-like	NA
cds41280	3.31174	4.85086e-06	product=protein P21-like	NA
cds41483	6.5276	0.000740996	product=uncharacterized protein LOC105037518	NA
cds41674	6.96622	0.000226822	product=uncharacterized protein LOC105037740	NA
cds41803	-0.472248	0.0142898	product=ribosomal protein S16	NA
cds41830	-0.84556	0.0224441	product=acetyl-CoA carboxylase carboxyltransferase beta subunit	Carbon fixation pathways in prokaryotes, Biosynthesis of antibiotics, Propanoate metabolism, Pyruvate metabolism, Aflatoxin biosynthesis, Fatty acid biosynthesis
cds41833	1.01366	0.0328987	product=envelope membrane protein	NA
cds41880	0.733385	2.5142e-07	product=hypothetical protein RF1	NA
cds4405	-1.35856	2.51327e-37	product=probable splicing factor 3A subunit 1	NA
cds4407	-5.1855	0.0420066	product=uncharacterized protein LOC105038064	NA
cds4568	3.02632	0.000591183	product=histone deacetylase HDT2	NA
cds5036	5.2448	9.72589e-13	product=22.7 kDa class IV heat shock protein-like	NA
cds5037	8.64067	1.87483e-07	product=22.0 kDa class IV heat shock protein-like	NA
cds5147	-2.22676	8.42196e-05	product=proteasome subunit beta type-5-like	NA
cds5170	4.99424	0.000217222	product=LOW QUALITY PROTEIN: heat shock 70 kDa protein 6%2C chloroplastic-like	NA
cds5479	1.72665	0.00110471	product=heat shock protein 81-1-like	Thiamine metabolism, Purine metabolism
cds5481	1.40906	0.017492	product=heat shock protein 81-1	NA
cds5644	-2.65403	1.23011e-06	product=peptidyl-prolyl cis-trans isomerase CYP28%2C chloroplastic	NA
cds5651	-2.31584	0.00500757	product=transmembrane 9 superfamily member 11	NA
cds5753	-1.94011	0.0141807	product=putative xyloglucan endotransglucosylase/hydrolase protein 1	NA
cds5846	-6.84134	0.00111027	product=UDP-glycosyltransferase 90A1-like	NA
cds5923	2.10897	0.0271431	product=4-coumarate--CoA ligase 2	NA
cds5948	-1.1572	0.000484144	product=plasma membrane ATPase	NA
cds6134	-2.62632	0.00281746	product=putative 4-hydroxy-4-methyl-2-oxoglutarate aldolase 3	NA
cds6296	-2.57248	0.00967524	product=S-adenosylmethionine decarboxylase proenzyme	NA
cds6657	-2.00107	0.0343205	product=peroxidase 3	NA
cds6955	6.61528	0.00319501	product=galactinol synthase 1-like	Galactose metabolism
cds6973	-2.76194	2.67811e-05	product=probable boron transporter 2	NA
cds7337	2.04953	0.000471973	product=heat shock 70 kDa protein 14-like	NA
cds7450	9.5274	3.76088e-09	product=17.3 kDa class II heat shock protein-like	NA
cds7451	9.48814	4.44367e-09	product=17.1 kDa class II heat shock protein-like	NA
cds7542	-3.1405	0.00209285	product=protein indeterminate-domain 7	NA
cds7766	-1.60534	0.000162193	product=transcription repressor OFP7-like	NA
cds8002	4.15376	0.00743452	product=uncharacterized protein LOC105040735	NA
cds8044	5.40275	4.77462e-19	product=BAG family molecular chaperone regulator 6	NA
cds819	5.58687	2.37661e-34	product=chaperone protein ClpB1	NA
cds8343	-0.710258	0.00205289	product=trans-resveratrol di-O-methyltransferase-like	NA
cds8682	1.73393	0.0191746	product=uncharacterized protein LOC105041198	NA
cds8753	7.80453	3.01228e-06	product=18.1 kDa class I heat shock protein	NA
cds8754	5.47193	2.89278e-14	product=18.1 kDa class I heat shock protein-like	NA
cds8755	5.49626	5.70037e-26	product=16.9 kDa class I heat shock protein 2-like	NA
cds8758	8.04482	2.48908e-06	product=17.6 kDa class I heat shock protein-like	NA
cds8759	4.77546	9.13565e-29	product=16.9 kDa class I heat shock protein 2	NA
cds9134	2.73165	0.000158744	product=inositol-3-phosphate synthase-like	NA
cds9212	1.38481	0.0295886	product=uncharacterized protein OsI_027940	NA
cds9461	3.3614	0.00817352	product=uncharacterized protein LOC105041882	NA
cds9632	6.82648	3.48322e-09	product=17.4 kDa class III heat shock protein	NA
cds9780	2.87766	1.39626e-08	product=pathogenesis-related protein PR-4-like	NA

## Sheet: Inflo.6T and Inflo.4C NA
gene	log2FoldChange	padj	product	Pathway
cds10499	4.90785	2.63794e-45	product=small heat shock protein%2C chloroplastic-like	NA
cds10500	9.98175	3.94661e-10	product=small heat shock protein%2C chloroplastic-like	NA
cds10571	1.80387	0.0490437	product=osmotin-like protein	NA
cds10573	2.58172	6.4259e-32	product=heat shock cognate 70 kDa protein 2-like	NA
cds10627	1.69434	0.0457236	product=protochlorophyllide reductase	Porphyrin and chlorophyll metabolism
cds10732	2.87961	0.0431817	product=probable phospholipid hydroperoxide glutathione peroxidase	Arachidonic acid metabolism, Glutathione metabolism
cds11113	2.44278	1.32221e-10	product=chaperonin CPN60-2%2C mitochondrial	NA
cds11388	-1.04002	0.0396307	product=LOW QUALITY PROTEIN: subtilisin-like protease SBT1.3	NA
cds11468	3.54634	0.000799915	product=heat stress transcription factor B-2c-like	NA
cds11619	4.28742	1.91846e-07	product=hsp70-Hsp90 organizing protein	NA
cds11780	1.24843	0.0193863	product=PLAT domain-containing protein 3-like	NA
cds1199	6.06235	0.00181775	product=dnaJ homolog subfamily B member 13-like	NA
cds12288	3.58053	9.00796e-10	product=trans-resveratrol di-O-methyltransferase-like	NA
cds12503	5.4521	0.0176285	product=aquaporin PIP2-4 isoform X1	NA
cds12530	1.47417	0.0230053	product=ubiquitin-like protein 5	NA
cds13044	3.10686	0.000252895	product=dnaJ protein ERDJ3A	NA
cds13049	2.71603	0.0484131	product=pyruvate decarboxylase 1	Glycolysis / Gluconeogenesis
cds13429	-1.89593	0.00667267	product=LOW QUALITY PROTEIN: uncharacterized protein LOC105044933	NA
cds13446	1.20832	0.0211937	product=ubiquitin-40S ribosomal protein S27a	NA
cds13524	-2.86818	0.0125049	product=ATP-citrate synthase beta chain protein 1	Citrate cycle (TCA cycle)
cds13583	2.53346	0.00837041	product=universal stress protein A-like protein	NA
cds13622	-0.907263	3.04984e-11	product=polyphenol oxidase%2C chloroplastic-like	NA
cds13699	2.23321	0.000345688	product=late embryogenesis abundant protein Lea5-like	NA
cds13706	-2.51836	0.0318642	product=UDP-glucuronic acid decarboxylase 2 isoform X1	Acarbose and validamycin biosynthesis, Polyketide sugar unit biosynthesis, Biosynthesis of vancomycin group antibiotics
cds13910	-1.97569	0.0474256	product=glucan endo-1%2C3-beta-glucosidase-like	NA
cds13911	-2.04917	3.49879e-09	product=glucan endo-1%2C3-beta-glucosidase	NA
cds14056	6.01376	0.00760039	product=10 kDa chaperonin%2C mitochondrial	NA
cds14131	3.38645	0.0318642	product=uncharacterized protein At3g03773	NA
cds1451	7.81263	3.69713e-12	product=18.1 kDa class I heat shock protein-like	NA
cds14861	4.90697	0.0336651	product=ruvB-like protein 1	NA
cds14919	2.00009	2.89854e-39	product=probable mediator of RNA polymerase II transcription subunit 37c	NA
cds15084	-5.96634	0.00638758	product=laccase-25-like	NA
cds15097	3.35353	1.858e-39	product=18.1 kDa class I heat shock protein	NA
cds1510	7.52928	3.05619e-05	product=chaperone protein DnaJ-like isoform X1	NA
cds15114	2.0209	0.0155005	product=serine/arginine-rich splicing factor SR45a isoform X1	NA
cds1517	-1.30076	2.94649e-10	product=uncharacterized protein LOC105049307	NA
cds15463	3.24134	3.86743e-10	product=early light-induced protein 1%2C chloroplastic	NA
cds16219	2.53963	0.0104523	product=chlorophyll a-b binding protein of LHCII type 1	NA
cds16308	5.19508	2.98682e-09	product=dnaJ homolog subfamily B member 13-like	NA
cds16522	7.30065	1.52312e-10	product=chaperone protein ClpB1-like	NA
cds16666	-2.63342	1.21554e-16	product=acidic endochitinase	Phenylpropanoid biosynthesis, Starch and sucrose metabolism, Cyanoamino acid metabolism
cds17133	2.93269	0.00181775	product=3-ketoacyl-CoA synthase 11	Biosynthesis of unsaturated fatty acids, Fatty acid elongation
cds17200	3.43751	1.11662e-21	product=heat shock 70 kDa protein 14-like	NA
cds17264	5.59422	1.25149e-20	product=17.3 kDa class II heat shock protein-like	NA
cds1745	-1.91401	0.0322966	product=heavy metal-associated isoprenylated plant protein 37-like	NA
cds17554	-1.54434	0.0272404	product=GDSL esterase/lipase At5g45910	NA
cds17665	9.83505	5.27783e-10	product=BAG family molecular chaperone regulator 6-like	NA
cds17666	8.54403	3.08888e-07	product=uncharacterized protein LOC109506047	NA
cds17788	-5.7677	0.00839275	product=plasma membrane-associated cation-binding protein 1	NA
cds17876	-1.28536	4.35279e-06	product=GDP-L-galactose phosphorylase 1-like isoform X3	NA
cds18007	2.17218	0.0228691	product=tetraketide alpha-pyrone reductase 2	NA
cds18067	10.1771	1.44591e-10	product=16.9 kDa class I heat shock protein 2-like	NA
cds18069	10.4894	3.03655e-11	product=18.1 kDa class I heat shock protein	NA
cds18212	-0.544621	0.0231059	product=leucine-rich repeat extensin-like protein 4	NA
cds18270	1.94136	0.000698362	product=phospho-2-dehydro-3-deoxyheptonate aldolase 2%2C chloroplastic	Phenylalanine, tyrosine and tryptophan biosynthesis
cds18319	2.24387	2.68472e-21	product=inositol-3-phosphate synthase	NA
cds18385	3.80299	0.00891835	product=E3 ubiquitin-protein ligase RING1-like	NA
cds18398	-3.96201	5.49139e-05	product=EG45-like domain containing protein	NA
cds18406	4.31104	9.77992e-08	product=protein BOBBER 1	NA
cds18839	-4.6829	2.96468e-06	product=berberine bridge enzyme-like 18	NA
cds18974	-5.38181	0.0318642	product=uncharacterized protein LOC105049306	NA
cds19291	4.21982	0.00151792	product=chaperone protein ClpB3%2C mitochondrial	NA
cds19962	0.979798	0.000714801	product=heat shock protein 81-1	NA
cds20655	-2.42686	0.0347081	product=aspartyl protease family protein At5g10770-like	NA
cds20728	8.78002	1.35046e-07	product=18.1 kDa class I heat shock protein	NA
cds20729	9.19922	1.54918e-08	product=18.1 kDa class I heat shock protein	NA
cds20880	3.29862	8.03768e-06	product=temperature-induced lipocalin-1	NA
cds20910	9.49854	4.32286e-09	product=heat shock 70 kDa protein-like	NA
cds21009	-0.978766	1.15327e-25	product=uncharacterized protein LOC105050802	NA
cds21149	8.65694	2.22292e-07	product=uncharacterized protein LOC105050886	NA
cds21205	2.38852	0.0162944	product=chalcone synthase 2	Flavonoid biosynthesis
cds21216	7.31529	4.56558e-05	product=uncharacterized protein LOC105050969	NA
cds21397	5.85957	6.44201e-28	product=calponin homology domain-containing protein DDB_G0272472	NA
cds21536	-5.1409	0.0480369	product=uncharacterized WD repeat-containing protein C2A9.03	NA
cds21737	2.84918	3.03655e-11	product=stromal 70 kDa heat shock-related protein%2C chloroplastic	NA
cds21937	-1.47276	0.000339012	product=endochitinase EP3-like	NA
cds22011	-1.71964	0.000120974	product=FRIGIDA-like protein 3	NA
cds22608	1.60088	1.52312e-10	product=knob-associated histidine-rich protein-like	NA
cds22687	2.96675	6.22504e-06	product=uncharacterized protein LOC105052114 isoform X2	NA
cds22755	3.21916	0.0112278	product=digalactosyldiacylglycerol synthase 1%2C chloroplastic	Glycerolipid metabolism
cds22859	-5.76665	0.0112562	product=uncharacterized protein C24B11.05-like	NA
cds22865	5.49187	0.0314043	product=heat shock cognate 70 kDa protein 2-like	NA
cds23001	-0.843636	0.0323925	product=trans-cinnamate 4-monooxygenase	NA
cds23463	3.97061	0.0280038	product=uncharacterized protein LOC105052568	NA
cds23713	2.57009	0.000429606	product=heat shock 70 kDa protein%2C mitochondrial	NA
cds23887	-1.3345	0.00675301	product=fructose-bisphosphate aldolase 1%2C cytoplasmic-like	Fructose and mannose metabolism, Carbon fixation in photosynthetic organisms, Pentose phosphate pathway, Methane metabolism
cds24177	3.24872	5.74036e-06	product=16.0 kDa heat shock protein%2C peroxisomal	NA
cds24191	-1.82072	0.0480369	product=protein TIFY 6b	NA
cds24268	1.72594	1.24601e-07	product=5-methyltetrahydropteroyltriglutamate--homocysteine methyltransferase 2-like	One carbon pool by folate, Selenocompound metabolism
cds24299	4.75955	0.0347081	product=T-complex protein 1 subunit theta	NA
cds24535	4.23053	2.06789e-09	product=BI1-like protein	NA
cds24624	1.57007	0.0330359	product=cell division cycle protein 48 homolog	NA
cds24674	-5.76238	0.00973965	product=thaumatin-like protein 1b	NA
cds24676	-5.48521	3.83389e-20	product=thaumatin-like protein 1b	NA
cds24677	-3.72315	1.77681e-23	product=thaumatin-like protein 1b	NA
cds24678	-1.73677	0.0397183	product=thaumatin-like protein 1b	NA
cds24760	-2.99264	0.0323925	product=uncharacterized protein LOC105053665	NA
cds24834	2.29872	0.00354136	product=DNA-binding protein SMUBP-2	NA
cds24861	1.33864	4.82825e-05	product=leucoanthocyanidin dioxygenase-like	NA
cds25090	-3.73303	0.0103044	product=myb-related protein 308-like	NA
cds25213	3.62477	3.03655e-11	product=hsp70-Hsp90 organizing protein	NA
cds25393	-3.4288	7.57474e-05	product=glutamate dehydrogenase 2%2C mitochondrial	Taurine and hypotaurine metabolism, D-Glutamine and D-glutamate metabolism, Arginine biosynthesis, Alanine, aspartate and glutamate metabolism, Nitrogen metabolism
cds2556	-4.4849	0.000378285	product=LOW QUALITY PROTEIN: uncharacterized protein LOC105054732	NA
cds25709	-0.961341	4.15018e-10	product=calcium-dependent protein kinase 18	NA
cds25864	-0.965561	0.0458072	product=phosphoenolpyruvate carboxykinase [ATP]	NA
cds26081	8.93937	3.44255e-24	product=heat shock protein 83	NA
cds26082	4.55782	7.97763e-29	product=heat shock protein 83-like	NA
cds26283	0.823422	0.000872848	product=catalase isozyme 2	Tryptophan metabolism, Glyoxylate and dicarboxylate metabolism
cds26342	-1.18039	6.952e-08	product=probable polygalacturonase	NA
cds26496	1.52332	1.17276e-06	product=endoplasmin homolog	NA
cds26771	5.3212	0.0287044	product=protein CCA1	NA
cds26972	3.46336	0.0480369	product=uncharacterized protein LOC105055449	NA
cds27734	2.83248	0.00535956	product=nodulin-related protein 1	NA
cds27784	-3.40941	0.00638758	product=flavonol 3-sulfotransferase-like	Glucosinolate biosynthesis
cds27914	2.00227	0.0294135	product=probable indole-3-acetic acid-amido synthetase GH3.8	NA
cds28356	-3.76492	0.0349435	product=putative laccase-9	NA
cds28384	-3.88057	0.000260885	product=F-box/kelch-repeat protein SKIP11-like	NA
cds2866	-1.73465	0.00956115	product=UDP-arabinopyranose mutase 1	NA
cds28806	0.852312	0.0198139	product=elongation factor 1-alpha	NA
cds28952	4.79457	6.14146e-76	product=probable mediator of RNA polymerase II transcription subunit 37c	NA
cds2930	-1.33354	0.0171566	product=UDP-glucose 6-dehydrogenase 5-like	Ascorbate and aldarate metabolism, Amino sugar and nucleotide sugar metabolism, Pentose and glucuronate interconversions
cds29328	1.39342	0.0322966	product=60S ribosomal protein L10	NA
cds29352	2.51579	0.0490437	product=LOW QUALITY PROTEIN: 2%2C3-bisphosphoglycerate-independent phosphoglycerate mutase-like	NA
cds29429	-1.67221	8.02986e-09	product=S-adenosylmethionine synthase	Cysteine and methionine metabolism
cds29652	-1.86095	0.0198615	product=pathogenesis-related protein 1-like	NA
cds29676	-3.20816	0.00284469	product=putative UDP-rhamnose:rhamnosyltransferase 1	NA
cds29747	4.10446	8.22632e-29	product=polyubiquitin	NA
cds30141	2.24874	0.00472175	product=uncharacterized protein LOC105057911	NA
cds30555	2.73649	0.0125249	product=probable zinc metallopeptidase EGY3%2C chloroplastic	NA
cds30763	1.6543	0.0269638	product=phosphopantothenoylcysteine decarboxylase subunit VHS3	NA
cds31282	-0.692698	0.040002	product=LOW QUALITY PROTEIN: uncharacterized protein LOC105058786	NA
cds31356	5.11225	0.0322966	product=cytochrome c1-2%2C heme protein%2C mitochondrial	NA
cds31469	-1.11815	0.00549025	product=early nodulin-75-like	NA
cds31500	-3.40833	0.0421689	product=LOW QUALITY PROTEIN: methyltransferase-like protein 1	NA
cds31997	2.39817	4.39819e-12	product=histone H1-like	NA
cds31998	-2.14334	0.0176285	product=histone H3.3	NA
cds32049	-4.24899	3.03655e-11	product=GDP-mannose 4%2C6 dehydratase 1-like	NA
cds32076	4.15426	7.95593e-12	product=bax inhibitor 1	NA
cds32128	3.5226	6.42923e-77	product=heat shock protein 83	NA
cds32220	-2.82318	0.0180576	product=homeobox protein BEL1 homolog	NA
cds32432	-2.60931	0.000560035	product=chitinase 1-like	NA
cds32434	-3.47716	2.52096e-21	product=chitinase 1	NA
cds32983	-1.6052	1.82351e-40	product=pathogenesis-related protein PRB1-3-like	NA
cds32985	-2.8948	2.24167e-07	product=pathogenesis-related protein PRB1-3-like	NA
cds33322	0.974175	0.00270838	product=calnexin homolog	NA
cds33340	0.7555	0.00286365	product=chalcone synthase 1-like	NA
cds3339	1.23755	0.0266771	product=Bowman-Birk type trypsin inhibitor-like	NA
cds33599	-1.07394	0.0204921	product=homeobox-leucine zipper protein HOX20-like	NA
cds33692	2.83571	1.40763e-06	product=ruBisCO large subunit-binding protein subunit beta%2C chloroplastic	NA
cds33695	4.46215	0.0457971	product=uncharacterized protein LOC105060639	NA
cds34529	-3.04153	0.0318642	product=acyl-CoA-binding protein	NA
cds34788	1.99387	0.0257658	product=ribosomal RNA-processing protein 14-C	NA
cds34830	-1.5529	0.000134852	product=dormancy-associated protein 1	NA
cds34925	-3.2985	0.000267525	product=alpha carbonic anhydrase 7-like	NA
cds35164	1.56436	1.6253e-11	product=probable glutathione S-transferase GSTF1	Drug metabolism - cytochrome P450, Metabolism of xenobiotics by cytochrome P450, Drug metabolism - other enzymes
cds35189	1.83033	4.10072e-06	product=chlorophyll a-b binding protein of LHCII type 1	NA
cds35361	7.45234	0.000178345	product=heat shock 70 kDa protein	NA
cds35500	2.74339	6.44771e-31	product=70 kDa peptidyl-prolyl isomerase	NA
cds3552	-2.22107	0.000126694	product=protein P21-like	NA
cds35550	-2.944	4.78302e-14	product=probable linoleate 9S-lipoxygenase 4	NA
cds35558	3.24866	0.0135662	product=heat shock protein 90-6%2C mitochondrial	NA
cds35587	-2.437	0.0494581	product=endo-1%2C3%3B1%2C4-beta-D-glucanase	NA
cds36334	3.35006	0.0192031	product=protein TPR3	NA
cds36726	-2.13852	0.0118165	product=cysteine proteinase inhibitor 12-like	NA
cds37099	-2.23717	0.0113883	product=probable arabinose 5-phosphate isomerase	Lipopolysaccharide biosynthesis
cds37325	-5.68293	0.016561	product=CASP-like protein 2B1	NA
cds37412	1.58041	0.0160362	product=60S acidic ribosomal protein P2B	NA
cds37447	7.49164	3.67823e-05	product=17.6 kDa class I heat shock protein-like	NA
cds37479	-1.29196	1.70276e-18	product=uncharacterized protein LOC109505017	NA
cds37481	-0.608465	0.00388538	product=uncharacterized protein LOC105033943	Oxidative phosphorylation
cds37500	-4.51505	7.51155e-25	product=glucan endo-1%2C3-beta-glucosidase-like	NA
cds37955	2.8984	1.85542e-43	product=dnaJ protein homolog	NA
cds38208	2.19261	8.32019e-19	product=dnaJ protein homolog	NA
cds38555	2.06049	0.0108963	product=protein HEAT-STRESS-ASSOCIATED 32	NA
cds38904	-0.911147	0.0396307	product=5-methyltetrahydropteroyltriglutamate--homocysteine methyltransferase 1	NA
cds39551	1.45236	0.0222053	product=ruBisCO large subunit-binding protein subunit beta%2C chloroplastic	NA
cds40206	4.54511	5.57063e-07	product=heat shock 70 kDa protein 8	NA
cds40420	1.4231	0.0318642	product=LOW QUALITY PROTEIN: uncharacterized protein LOC105036288	NA
cds40426	-0.772337	0.00354136	product=uncharacterized protein LOC109505207	NA
cds40504	-2.23966	0.0257016	product=uncharacterized protein LOC109505214	NA
cds40532	5.15497	0.0214937	product=uncharacterized protein LOC105036401	NA
cds40611	-2.55987	0.0148671	product=alcohol dehydrogenase 1	NA
cds40692	0.77059	0.030059	product=heat shock protein 81-1	NA
cds40958	-3.19011	5.41645e-15	product=polyphenol oxidase%2C chloroplastic	NA
cds40973	-2.90846	0.0012607	product=chalcone synthase-like	NA
cds40991	-2.33344	9.73398e-05	product=reticuline oxidase	NA
cds41102	-1.31404	6.53546e-07	product=LOW QUALITY PROTEIN: uncharacterized protein LOC109505288	NA
cds41222	1.68815	7.13662e-11	product=probable aquaporin TIP1-1	NA
cds41280	-1.93661	7.36839e-16	product=protein P21-like	NA
cds41407	-1.39613	6.99229e-06	product=Bowman-Birk type trypsin inhibitor-like	NA
cds41483	5.78382	0.00405042	product=uncharacterized protein LOC105037518	NA
cds41674	6.22246	0.00130893	product=uncharacterized protein LOC105037740	NA
cds41801	0.594414	0.028054	product=photosystem II protein D1	NA
cds41802	-1.028	0.00573143	product=maturase K	NA
cds41803	-0.403012	0.0322966	product=ribosomal protein S16	NA
cds41816	1.32037	0.0484131	product=photosystem II protein D2	NA
cds41819	-0.586079	0.0304061	product=ribosomal protein S14	NA
cds41830	-0.93617	0.0027836	product=acetyl-CoA carboxylase carboxyltransferase beta subunit	Fatty acid biosynthesis, Pyruvate metabolism, Carbon fixation pathways in prokaryotes, Propanoate metabolism, Aflatoxin biosynthesis, Biosynthesis of antibiotics
cds41843	-2.23713	0.0329787	product=ribosomal protein S18	NA
cds41846	-1.05848	0.000560035	product=clp protease proteolytic subunit	NA
cds41850	-1.54844	0.0020208	product=photosystem II phosphoprotein	NA
cds41854	0.824797	1.3745e-05	product=ribosomal protein S11	NA
cds41856	-0.650096	0.0349435	product=translational initiation factor 1	NA
cds41859	-0.8874	7.4209e-10	product=50S ribosomal protein L16	NA
cds41861	-0.686264	0.00733085	product=50S ribosomal protein L22	NA
cds41862	-0.88508	0.00603498	product=ribosomal protein S19	NA
cds41886	-0.856166	0.00705883	product=ribosomal protein S19	NA
cds4405	-0.7401	2.82647e-11	product=probable splicing factor 3A subunit 1	NA
cds4568	1.96002	0.000571516	product=histone deacetylase HDT2	NA
cds4948	1.33031	0.0110819	product=alcohol dehydrogenase 1	alpha-Linolenic acid metabolism, Tyrosine metabolism, Glycine, serine and threonine metabolism, Naphthalene degradation, Fatty acid degradation, Chloroalkane and chloroalkene degradation
cds5036	6.68105	5.80824e-13	product=22.7 kDa class IV heat shock protein-like	NA
cds5037	9.34	8.02986e-09	product=22.0 kDa class IV heat shock protein-like	NA
cds5170	6.6917	0.000229614	product=LOW QUALITY PROTEIN: heat shock 70 kDa protein 6%2C chloroplastic-like	NA
cds5479	0.92297	0.0484131	product=heat shock protein 81-1-like	Purine metabolism, Thiamine metabolism
cds5518	-2.08185	0.000526797	product=uncharacterized protein LOC105038944	NA
cds5523	-7.27203	4.08744e-05	product=tonoplast dicarboxylate transporter	NA
cds5651	-2.53207	0.000652744	product=transmembrane 9 superfamily member 11	NA
cds5753	-1.917	0.0107118	product=putative xyloglucan endotransglucosylase/hydrolase protein 1	NA
cds5948	-1.21875	3.72294e-05	product=plasma membrane ATPase	NA
cds6955	7.31461	0.000707992	product=galactinol synthase 1-like	Galactose metabolism
cds729	4.78827	0.0479289	product=transcription repressor OFP1-like	NA
cds7337	2.16347	8.3873e-06	product=heat shock 70 kDa protein 14-like	NA
cds7351	-4.56094	0.0111566	product=tryptophan aminotransferase-related protein 3-like	NA
cds7450	10.2267	1.1623e-10	product=17.3 kDa class II heat shock protein-like	NA
cds7451	10.1875	1.40633e-10	product=17.1 kDa class II heat shock protein-like	NA
cds7766	-1.16224	0.0118165	product=transcription repressor OFP7-like	NA
cds8002	2.85402	0.00427828	product=uncharacterized protein LOC105040735	NA
cds8044	5.32432	4.93784e-30	product=BAG family molecular chaperone regulator 6	NA
cds819	6.8707	4.46449e-36	product=chaperone protein ClpB1	NA
cds8398	-3.82464	1.7971e-06	product=chalcone synthase-like	NA
cds8444	-5.4462	9.00728e-05	product=pathogen-related protein-like	NA
cds8682	2.81505	3.8504e-05	product=uncharacterized protein LOC105041198	NA
cds8753	8.50372	1.88583e-07	product=18.1 kDa class I heat shock protein	NA
cds8754	5.90836	7.73792e-20	product=18.1 kDa class I heat shock protein-like	NA
cds8755	7.36544	1.24347e-21	product=16.9 kDa class I heat shock protein 2-like	NA
cds8758	8.74415	1.50948e-07	product=17.6 kDa class I heat shock protein-like	NA
cds8759	4.69692	2.58287e-44	product=16.9 kDa class I heat shock protein 2	NA
cds8842	-6.58695	0.0023002	product=transcription factor bHLH30-like	NA
cds9007	-2.9968	0.028589	product=transcription factor SAC51-like	NA
cds9134	1.06849	0.0255104	product=inositol-3-phosphate synthase-like	Streptomycin biosynthesis, Inositol phosphate metabolism
cds9212	1.66865	0.00152758	product=uncharacterized protein OsI_027940	NA
cds9314	3.5019	0.00454309	product=protein BOBBER 1	NA
cds9461	4.0591	0.000560035	product=uncharacterized protein LOC105041882	NA
cds9529	-2.19967	0.0329787	product=7-deoxyloganetin glucosyltransferase-like	Retinol metabolism, Steroid hormone biosynthesis
cds9632	5.94085	1.0657e-19	product=17.4 kDa class III heat shock protein	NA
cds9780	-1.80926	9.08471e-19	product=pathogenesis-related protein PR-4-like	NA
cds9817	3.27742	0.00110493	product=uncharacterized protein LOC105042213	NA

## Sheet:  Inflo.4T WA and Inflo.2C NA2
gene	log2FoldChange	padj	product	Pathway
cds10499	3.70107	2.99492e-20	product=small heat shock protein%2C chloroplastic-like	NA
cds10500	7.0913	0.000394133	product=small heat shock protein%2C chloroplastic-like	NA
cds10573	3.66903	2.07744e-30	product=heat shock cognate 70 kDa protein 2-like	NA
cds11113	1.71507	0.0004411	product=chaperonin CPN60-2%2C mitochondrial	NA
cds1199	5.98465	0.0239599	product=dnaJ homolog subfamily B member 13-like	NA
cds12213	2.48732	0.0208102	product=probable aquaporin PIP2-6	NA
cds12684	0.626358	0.0239599	product=metallothionein-like protein type 2	NA
cds12685	5.86595	0.0290031	product=metallothionein-like protein type 2	NA
cds13097	3.1034	0.01505	product=uncharacterized protein At5g01610	NA
cds13622	-1.7974	2.59948e-26	product=polyphenol oxidase%2C chloroplastic-like	NA
cds13699	3.16207	1.70347e-09	product=late embryogenesis abundant protein Lea5-like	NA
cds13911	-5.25702	0.000135771	product=glucan endo-1%2C3-beta-glucosidase	NA
cds14411	-1.08523	0.000161137	product=cation/H(+) antiporter 15	NA
cds1451	5.91544	3.0534e-09	product=18.1 kDa class I heat shock protein-like	NA
cds14919	2.27373	1.31357e-37	product=probable mediator of RNA polymerase II transcription subunit 37c	NA
cds15097	4.44404	6.8087e-23	product=18.1 kDa class I heat shock protein	NA
cds1510	6.37067	0.00821408	product=chaperone protein DnaJ-like isoform X1	NA
cds15463	2.7351	2.30291e-07	product=early light-induced protein 1%2C chloroplastic	NA
cds15853	1.73711	0.000124461	product=polyubiquitin 11	NA
cds16308	4.01172	0.0440315	product=dnaJ homolog subfamily B member 13-like	NA
cds16522	7.09215	0.000396257	product=chaperone protein ClpB1-like	NA
cds16666	-4.58444	3.37895e-05	product=acidic endochitinase	Cyanoamino acid metabolism, Starch and sucrose metabolism, Phenylpropanoid biosynthesis
cds17200	1.56459	0.000572846	product=heat shock 70 kDa protein 14-like	NA
cds17264	4.1769	3.04242e-15	product=17.3 kDa class II heat shock protein-like	NA
cds17665	5.70119	1.282e-11	product=BAG family molecular chaperone regulator 6-like	NA
cds17666	6.86924	0.00102578	product=uncharacterized protein LOC109506047	NA
cds18007	3.06601	0.021227	product=tetraketide alpha-pyrone reductase 2	NA
cds18067	9.74444	9.67386e-09	product=16.9 kDa class I heat shock protein 2-like	NA
cds18069	8.51435	1.25947e-06	product=18.1 kDa class I heat shock protein	NA
cds18109	2.61882	0.0264694	product=phospholipase A2-alpha	Glycerophospholipid metabolism, Ether lipid metabolism, Arachidonic acid metabolism
cds18212	-0.68776	0.0337372	product=leucine-rich repeat extensin-like protein 4	NA
cds18319	1.74092	1.57205e-14	product=inositol-3-phosphate synthase	Inositol phosphate metabolism, Streptomycin biosynthesis
cds18398	-5.76841	0.0264694	product=EG45-like domain containing protein	NA
cds18406	2.92903	0.000939806	product=protein BOBBER 1	NA
cds18924	-6.48648	0.00465212	product=7-deoxyloganetin glucosyltransferase-like	Metabolism of xenobiotics by cytochrome P450, Pentose and glucuronate interconversions, Steroid hormone biosynthesis, Ascorbate and aldarate metabolism, Zeatin biosynthesis, Drug metabolism - cytochrome P450, Retinol metabolism, Drug metabolism - other enzymes, Porphyrin and chlorophyll metabolism
cds20229	-2.71635	0.00212433	product=probable polygalacturonase	NA
cds20622	2.8424	0.00436204	product=ADP%2CATP carrier protein 1%2C mitochondrial	NA
cds20729	7.77889	4.08086e-05	product=18.1 kDa class I heat shock protein	NA
cds21397	4.88772	5.82147e-08	product=calponin homology domain-containing protein DDB_G0272472	NA
cds21695	5.48973	0.000292873	product=uncharacterized protein LOC105051598	NA
cds21737	1.91066	0.000441944	product=stromal 70 kDa heat shock-related protein%2C chloroplastic	NA
cds21937	-3.51606	1.72621e-05	product=endochitinase EP3-like	Amino sugar and nucleotide sugar metabolism
cds22608	0.963306	0.000335682	product=knob-associated histidine-rich protein-like	NA
cds23418	1.3	0.0335545	product=calreticulin	NA
cds23566	1.59268	0.0027353	product=vesicle-associated membrane protein 724	NA
cds23881	2.95526	0.0225461	product=succinate dehydrogenase [ubiquinone] iron-sulfur subunit 1%2C mitochondrial	Butanoate metabolism, Biosynthesis of antibiotics, Citrate cycle (TCA cycle), Carbon fixation pathways in prokaryotes
cds24268	4.0379	8.59069e-47	product=5-methyltetrahydropteroyltriglutamate--homocysteine methyltransferase 2-like	Cysteine and methionine metabolism, Selenocompound metabolism, One carbon pool by folate
cds24535	3.90032	0.00540261	product=BI1-like protein	NA
cds24676	-3.91516	0.0317793	product=thaumatin-like protein 1b	NA
cds24677	-8.30144	3.89305e-06	product=thaumatin-like protein 1b	NA
cds24895	3.94382	3.96565e-07	product=heavy metal-associated isoprenylated plant protein 9	NA
cds25213	2.17804	5.26479e-05	product=hsp70-Hsp90 organizing protein	NA
cds25864	-1.87387	0.00789239	product=phosphoenolpyruvate carboxykinase [ATP]	Carbon fixation in photosynthetic organisms, Glycolysis / Gluconeogenesis
cds26081	5.05199	8.63319e-44	product=heat shock protein 83	NA
cds26082	4.50482	2.15843e-19	product=heat shock protein 83-like	NA
cds26268	2.2108	9.40171e-05	product=luminal-binding protein 4	NA
cds26496	1.55013	1.05003e-07	product=endoplasmin homolog	Purine metabolism, Thiamine metabolism
cds26668	6.8135	0.0391085	product=uncharacterized protein LOC105055199	Aminobenzoate degradation
cds27118	3.72028	0.0264694	product=protein WALLS ARE THIN 1	NA
cds27206	4.42449	0.0364407	product=ruBisCO large subunit-binding protein subunit alpha-like	NA
cds28601	-0.991142	0.00924102	product=sucrose synthase 2	NA
cds28952	5.08548	1.99768e-42	product=probable mediator of RNA polymerase II transcription subunit 37c	NA
cds29352	4.30105	0.0255504	product=LOW QUALITY PROTEIN: 2%2C3-bisphosphoglycerate-independent phosphoglycerate mutase-like	NA
cds29428	3.19905	0.00151061	product=glutathione S-transferase U8-like	Glutathione metabolism
cds29592	1.13258	0.0335545	product=translationally-controlled tumor protein homolog	NA
cds29747	4.23024	9.58564e-24	product=polyubiquitin	NA
cds3095	-3.38237	0.0295995	product=transcriptional activator DEMETER	NA
cds31282	-1.23551	0.00178354	product=LOW QUALITY PROTEIN: uncharacterized protein LOC105058786	NA
cds31469	-1.94198	0.0440315	product=early nodulin-75-like	NA
cds32076	4.25749	0.000610992	product=bax inhibitor 1	NA
cds32128	4.91953	1.02579e-62	product=heat shock protein 83	NA
cds32326	-0.85212	0.023549	product=peptidyl-prolyl cis-trans isomerase CYP19-1	NA
cds32434	-3.29758	1.82996e-14	product=chitinase 1	NA
cds32983	-6.263	5.55571e-73	product=pathogenesis-related protein PRB1-3-like	NA
cds32984	-5.66723	3.37895e-05	product=pathogenesis-related protein PRB1-3-like	NA
cds32985	-8.27775	5.1464e-06	product=pathogenesis-related protein PRB1-3-like	NA
cds3340	-2.65646	9.40171e-05	product=Bowman-Birk type trypsin inhibitor-like	NA
cds33697	3.42012	1.82277e-19	product=isoflavone reductase-like protein	NA
cds34085	6.2903	0.0452895	product=homeobox-leucine zipper protein HOX12	NA
cds35500	1.12021	0.000463341	product=70 kDa peptidyl-prolyl isomerase	NA
cds35550	-3.36169	0.000410484	product=probable linoleate 9S-lipoxygenase 4	NA
cds35952	2.924	0.00080423	product=internal alternative NAD(P)H-ubiquinone oxidoreductase A1%2C mitochondrial	NA
cds37479	-0.855987	5.56235e-07	product=uncharacterized protein LOC109505017	NA
cds37500	-7.89602	1.88143e-05	product=glucan endo-1%2C3-beta-glucosidase-like	NA
cds37955	1.94307	1.25966e-14	product=dnaJ protein homolog	NA
cds38208	2.28041	4.84597e-12	product=dnaJ protein homolog	NA
cds38410	5.74239	0.0273817	product=fibrous sheath CABYR-binding protein-like	NA
cds40171	3.9561	0.00444718	product=defensin Ec-AMP-D2-like	NA
cds40206	3.11624	0.00307956	product=heat shock 70 kDa protein 8	NA
cds40239	-2.68123	5.18106e-05	product=polyphenol oxidase%2C chloroplastic-like	NA
cds40958	-6.72895	0.00098276	product=polyphenol oxidase%2C chloroplastic	NA
cds41280	-3.83602	9.96041e-10	product=protein P21-like	NA
cds41407	-4.04997	4.73104e-08	product=Bowman-Birk type trypsin inhibitor-like	NA
cds41803	-0.797571	1.41761e-07	product=ribosomal protein S16	NA
cds41856	-0.703701	0.0317793	product=translational initiation factor 1	NA
cds41857	-1.24701	2.57277e-09	product=ribosomal protein S8	NA
cds41861	-0.84869	0.00346212	product=50S ribosomal protein L22	NA
cds41880	-0.763457	2.26214e-09	product=hypothetical protein RF1	NA
cds41886	-0.948204	0.00924102	product=ribosomal protein S19	NA
cds4405	0.763327	1.66914e-11	product=probable splicing factor 3A subunit 1	NA
cds5036	5.562	6.70554e-08	product=22.7 kDa class IV heat shock protein-like	NA
cds5037	7.45581	0.000124461	product=22.0 kDa class IV heat shock protein-like	NA
cds5127	-3.05695	3.69317e-06	product=extracellular ribonuclease LE	NA
cds5518	-3.21359	0.00175912	product=uncharacterized protein LOC105038944	NA
cds5948	-3.12221	5.43355e-20	product=plasma membrane ATPase	Oxidative phosphorylation
cds6134	2.69753	0.0216381	product=putative 4-hydroxy-4-methyl-2-oxoglutarate aldolase 3	Benzoate degradation, C5-Branched dibasic acid metabolism, Pyruvate metabolism
cds6212	-1.88761	4.95229e-29	product=linoleate 13S-lipoxygenase 2-1%2C chloroplastic	Linoleic acid metabolism, alpha-Linolenic acid metabolism
cds6692	6.4575	0.0110936	product=40S ribosomal protein S21	NA
cds7450	6.16469	3.54928e-10	product=17.3 kDa class II heat shock protein-like	NA
cds7451	9.26215	8.29689e-08	product=17.1 kDa class II heat shock protein-like	NA
cds8044	4.20172	2.51596e-15	product=BAG family molecular chaperone regulator 6	NA
cds819	3.60497	6.56033e-14	product=chaperone protein ClpB1	NA
cds8753	6.4129	3.08151e-07	product=18.1 kDa class I heat shock protein	NA
cds8754	6.06227	3.54066e-13	product=18.1 kDa class I heat shock protein-like	NA
cds8755	8.6524	2.91764e-14	product=16.9 kDa class I heat shock protein 2-like	NA
cds8758	5.98491	0.01505	product=17.6 kDa class I heat shock protein-like	NA
cds8759	4.9994	6.56561e-28	product=16.9 kDa class I heat shock protein 2	NA
cds9461	4.7008	0.00651671	product=uncharacterized protein LOC105041882	NA
cds9632	6.5292	1.56045e-07	product=17.4 kDa class III heat shock protein	NA
cds9780	-2.25832	1.68517e-10	product=pathogenesis-related protein PR-4-like	NA

## Sheet: Inflo.4T WA and Inflo.2C NA1
gene	log2FoldChange	padj	product	Pathway
cds10415	2.43957	0.00393784	product=dehydrin COR410-like	NA
cds10499	3.575	2.5431e-13	product=small heat shock protein%2C chloroplastic-like	NA
cds10500	6.22929	0.000344337	product=small heat shock protein%2C chloroplastic-like	NA
cds10573	2.6377	1.15731e-17	product=heat shock cognate 70 kDa protein 2-like	NA
cds11113	1.59	0.00129688	product=chaperonin CPN60-2%2C mitochondrial	NA
cds13097	1.9803	0.046204	product=uncharacterized protein At5g01610	NA
cds13430	-0.859488	0.0140787	product=S-adenosylmethionine synthase	NA
cds13622	-0.762502	0.000278832	product=polyphenol oxidase%2C chloroplastic-like	NA
cds13911	-3.87503	0.00315017	product=glucan endo-1%2C3-beta-glucosidase	NA
cds14411	-2.09762	5.38e-20	product=cation/H(+) antiporter 15	NA
cds1451	5.05335	1.29326e-07	product=18.1 kDa class I heat shock protein-like	NA
cds14903	-3.26681	0.021789	product=histone H2B.11	NA
cds14919	1.66605	3.58298e-19	product=probable mediator of RNA polymerase II transcription subunit 37c	NA
cds15097	3.4823	1.39686e-15	product=18.1 kDa class I heat shock protein	NA
cds1517	-1.88111	1.00467e-16	product=uncharacterized protein LOC105049307	NA
cds15463	2.34539	2.77472e-05	product=early light-induced protein 1%2C chloroplastic	NA
cds15853	1.01829	0.0266735	product=polyubiquitin 11	NA
cds15856	-1.48077	0.0466026	product=thiamine thiazole synthase%2C chloroplastic	NA
cds16308	3.14962	0.0316277	product=dnaJ homolog subfamily B member 13-like	NA
cds16317	-2.65353	0.00288962	product=protein DEHYDRATION-INDUCED 19	NA
cds16522	6.23015	0.000344337	product=chaperone protein ClpB1-like	NA
cds16543	-1.14156	0.0052665	product=elongation factor 2-like	NA
cds17200	2.22397	1.29821e-05	product=heat shock 70 kDa protein 14-like	NA
cds17264	3.96631	3.32865e-10	product=17.3 kDa class II heat shock protein-like	NA
cds17320	-2.82805	0.0201383	product=uncharacterized protein LOC105047980	NA
cds17665	6.83903	3.5901e-05	product=BAG family molecular chaperone regulator 6-like	NA
cds17666	6.00721	0.000789381	product=uncharacterized protein LOC109506047	NA
cds17943	1.34571	0.0181113	product=phosphoglucomutase%2C cytoplasmic 2	NA
cds18067	8.88241	3.25745e-08	product=16.9 kDa class I heat shock protein 2-like	NA
cds18069	5.65236	1.21563e-12	product=18.1 kDa class I heat shock protein	NA
cds18212	0.646973	0.0347401	product=leucine-rich repeat extensin-like protein 4	NA
cds18319	1.68171	5.07874e-11	product=inositol-3-phosphate synthase	Streptomycin biosynthesis, Inositol phosphate metabolism
cds18406	4.06498	0.00201263	product=protein BOBBER 1	NA
cds18803	-2.22599	0.0451656	product=SART-1 family protein DOT2	NA
cds19963	2.0303	0.017379	product=heat shock protein 90-2-like	NA
cds20728	4.7455	0.0168085	product=18.1 kDa class I heat shock protein	NA
cds20910	5.50771	0.00259551	product=heat shock 70 kDa protein-like	NA
cds21009	0.76329	2.7147e-15	product=uncharacterized protein LOC105050802	NA
cds21397	3.44028	1.56272e-06	product=calponin homology domain-containing protein DDB_G0272472	NA
cds21737	2.25323	2.92741e-05	product=stromal 70 kDa heat shock-related protein%2C chloroplastic	NA
cds21939	-0.800973	0.0308275	product=chitinase 6-like	NA
cds22310	-0.981767	1.01458e-06	product=receptor-like protein kinase	NA
cds22529	-1.37771	0.0451656	product=cellulose synthase-like protein H1	NA
cds22608	0.914697	0.000508505	product=knob-associated histidine-rich protein-like	NA
cds23376	-2.2936	0.017783	product=eukaryotic translation initiation factor 3 subunit A	NA
cds23418	1.47074	0.00433431	product=calreticulin	NA
cds23832	1.68896	0.0143163	product=60S ribosomal protein L23	NA
cds24177	4.5058	0.0207159	product=16.0 kDa heat shock protein%2C peroxisomal	NA
cds24268	1.41293	3.28348e-11	product=5-methyltetrahydropteroyltriglutamate--homocysteine methyltransferase 2-like	Cysteine and methionine metabolism, Selenocompound metabolism, One carbon pool by folate
cds24306	-1.44407	1.03067e-05	product=YTH domain-containing family protein 1	NA
cds24535	4.62463	0.0159413	product=BI1-like protein	NA
cds24861	3.3953	0.00147833	product=leucoanthocyanidin dioxygenase-like	NA
cds24992	-1.65751	0.0407618	product=V-type proton ATPase 16 kDa proteolipid subunit	NA
cds25213	2.2528	0.00013252	product=hsp70-Hsp90 organizing protein	NA
cds25249	-1.70011	0.0347401	product=protein NRT1/ PTR FAMILY 6.3-like	NA
cds2572	-1.33995	0.046204	product=uncharacterized protein LOC105054863	NA
cds26002	1.6866	0.000344337	product=naringenin%2C2-oxoglutarate 3-dioxygenase	NA
cds26081	4.05282	9.0505e-31	product=heat shock protein 83	NA
cds26082	4.22799	7.15257e-13	product=heat shock protein 83-like	NA
cds26268	2.14137	0.000235028	product=luminal-binding protein 4	NA
cds26496	2.65797	1.39131e-12	product=endoplasmin homolog	Purine metabolism, Thiamine metabolism
cds28952	3.71669	9.0505e-31	product=probable mediator of RNA polymerase II transcription subunit 37c	NA
cds28970	1.14947	0.021789	product=metallothionein-like protein type 2	NA
cds29562	-2.27015	0.0469747	product=40S ribosomal protein S4-3	NA
cds29592	0.981422	0.030685	product=translationally-controlled tumor protein homolog	NA
cds29747	2.93229	4.3656e-15	product=polyubiquitin	NA
cds3025	-2.02164	9.55524e-06	product=subtilisin-like protease SBT1.7	NA
cds30867	-1.91699	0.0430737	product=homeobox-leucine zipper protein HOX20-like	NA
cds3095	-2.5215	0.0466026	product=transcriptional activator DEMETER	NA
cds31972	1.9194	0.0407618	product=DEAD-box ATP-dependent RNA helicase 7	NA
cds32049	-5.97518	0.000600669	product=GDP-mannose 4%2C6 dehydratase 1-like	NA
cds32076	3.39374	0.00201263	product=bax inhibitor 1	NA
cds32128	1.98121	2.14135e-26	product=heat shock protein 83	NA
cds32336	2.90601	0.00074978	product=endoplasmin homolog	NA
cds33312	-3.10897	0.0407618	product=respiratory burst oxidase homolog protein C-like	NA
cds33322	1.42618	0.000303464	product=calnexin homolog	NA
cds35500	1.60171	1.56272e-06	product=70 kDa peptidyl-prolyl isomerase	NA
cds36442	-1.60173	0.0233792	product=40S ribosomal protein S2-2-like	NA
cds36564	-1.79966	0.0355177	product=transcription repressor MYB5-like	NA
cds36665	-2.07783	0.0451656	product=isoflavone reductase-like protein	NA
cds36782	-2.09191	0.0451656	product=FRIGIDA-like protein 4a	NA
cds36855	-1.45865	0.0282446	product=oryzain alpha chain	NA
cds37479	-0.498908	0.00879498	product=uncharacterized protein LOC109505017	NA
cds37955	1.15089	1.10336e-05	product=dnaJ protein homolog	NA
cds38208	1.5533	5.00947e-06	product=dnaJ protein homolog	NA
cds38364	-2.38777	0.0153763	product=LOW QUALITY PROTEIN: histone-lysine N-methyltransferase ATXR3	NA
cds39551	2.56763	0.00614915	product=ruBisCO large subunit-binding protein subunit beta%2C chloroplastic	NA
cds40078	-2.78363	0.00378666	product=putative disease resistance protein At5g47280	NA
cds40206	4.83934	0.0101153	product=heat shock 70 kDa protein 8	NA
cds40239	-1.86609	0.0064771	product=polyphenol oxidase%2C chloroplastic-like	NA
cds40426	-1.00213	1.4844e-05	product=uncharacterized protein LOC109505207	NA
cds40692	1.21682	0.00696272	product=heat shock protein 81-1	NA
cds41407	-2.72174	0.000466947	product=Bowman-Birk type trypsin inhibitor-like	NA
cds41563	-0.87806	0.00087349	product=BURP domain-containing protein 6-like	NA
cds41802	1.16281	0.0042062	product=maturase K	NA
cds41816	1.52554	0.0331606	product=photosystem II protein D2	NA
cds41819	1.1756	6.79546e-06	product=ribosomal protein S14	NA
cds41827	1.15578	2.62707e-06	product=ATP synthase CF1 epsilon subunit	NA
cds41829	0.863303	2.48413e-06	product=ribulose bisophosphate carboxylase	NA
cds41830	0.914695	0.00201263	product=acetyl-CoA carboxylase carboxyltransferase beta subunit	NA
cds41833	1.00319	0.0308275	product=envelope membrane protein	NA
cds41841	1.59821	0.00936742	product=photosystem I subunit IX	NA
cds41850	1.30034	0.0224122	product=photosystem II phosphoprotein	NA
cds41856	1.77769	2.40256e-08	product=translational initiation factor 1	NA
cds41858	0.840405	0.00150056	product=ribosomal protein L14	NA
cds41859	1.09644	3.32865e-10	product=50S ribosomal protein L16	NA
cds41861	0.824861	0.0133596	product=50S ribosomal protein L22	NA
cds41862	1.32518	0.000426655	product=ribosomal protein S19	NA
cds41867	1.33712	0.00696046	product=ribosomal protein S7	NA
cds41880	0.775942	1.22921e-07	product=hypothetical protein RF1	NA
cds41886	0.827066	0.0466026	product=ribosomal protein S19	NA
cds4264	-2.01904	0.00357446	product=36.4 kDa proline-rich protein-like	NA
cds4295	-1.53891	0.00920853	product=extensin-like	NA
cds4568	2.30155	0.0168085	product=histone deacetylase HDT2	NA
cds4592	3.43772	0.0166577	product=60S acidic ribosomal protein P2B	NA
cds5036	3.96247	2.76364e-07	product=22.7 kDa class IV heat shock protein-like	NA
cds5037	6.59378	0.00012684	product=22.0 kDa class IV heat shock protein-like	NA
cds5518	-2.02018	0.0498495	product=uncharacterized protein LOC105038944	NA
cds5644	-2.80517	2.24417e-05	product=peptidyl-prolyl cis-trans isomerase CYP28%2C chloroplastic	NA
cds5753	-2.12143	0.0193097	product=putative xyloglucan endotransglucosylase/hydrolase protein 1	NA
cds5899	-2.52002	0.0454169	product=zinc finger protein CONSTANS-LIKE 4	NA
cds5948	-1.68643	1.5175e-05	product=plasma membrane ATPase	Oxidative phosphorylation
cds6198	-2.74518	0.00224213	product=60S ribosomal protein L6	NA
cds6212	-0.836673	2.55183e-05	product=linoleate 13S-lipoxygenase 2-1%2C chloroplastic	Linoleic acid metabolism, alpha-Linolenic acid metabolism
cds711	0.912574	0.0274953	product=reticulon-like protein B3	NA
cds7157	1.68826	0.030685	product=transcription factor HY5	NA
cds7337	1.45722	0.0288349	product=heat shock 70 kDa protein 14-like	NA
cds7450	8.33051	2.76364e-07	product=17.3 kDa class II heat shock protein-like	NA
cds7451	8.40013	2.27569e-07	product=17.1 kDa class II heat shock protein-like	NA
cds7766	-1.01994	0.036121	product=transcription repressor OFP7-like	NA
cds8044	3.9923	2.95881e-10	product=BAG family molecular chaperone regulator 6	NA
cds819	2.96524	4.42997e-09	product=chaperone protein ClpB1	NA
cds8214	-3.02282	0.0451656	product=probable aquaporin TIP2-2	NA
cds8343	-1.12748	3.90601e-06	product=trans-resveratrol di-O-methyltransferase-like	NA
cds8753	6.55079	0.000100529	product=18.1 kDa class I heat shock protein	NA
cds8754	4.87775	2.29571e-11	product=18.1 kDa class I heat shock protein-like	NA
cds8755	5.62031	6.68303e-27	product=16.9 kDa class I heat shock protein 2-like	NA
cds8758	5.12287	0.00719737	product=17.6 kDa class I heat shock protein-like	NA
cds8759	4.03025	5.7571e-20	product=16.9 kDa class I heat shock protein 2	NA
cds9134	2.382	0.00147833	product=inositol-3-phosphate synthase-like	NA
cds9632	5.66711	1.43092e-06	product=17.4 kDa class III heat shock protein	NA
cds9780	1.34967	0.046204	product=pathogenesis-related protein PR-4-like	NA

## Sheet: Inflo.4T WA and Inflo.4C NA
gene	log2FoldChange	padj	product	Pathway
cds10499	3.33605	5.3747e-19	product=small heat shock protein%2C chloroplastic-like	NA
cds10500	6.92861	7.60204e-05	product=small heat shock protein%2C chloroplastic-like	NA
cds10573	2.04641	1.02695e-17	product=heat shock cognate 70 kDa protein 2-like	NA
cds11113	1.82232	3.76104e-05	product=chaperonin CPN60-2%2C mitochondrial	NA
cds11324	-2.27546	0.00411926	product=heavy metal-associated isoprenylated plant protein 39	NA
cds12169	-3.44925	0.0280983	product=protein NRT1/ PTR FAMILY 8.3	NA
cds12288	2.83291	1.74343e-05	product=trans-resveratrol di-O-methyltransferase-like	NA
cds12505	-1.43517	0.0465443	product=uncharacterized protein LOC105044287	NA
cds12530	1.59778	0.0149338	product=ubiquitin-like protein 5	NA
cds13044	2.39489	0.0158587	product=dnaJ protein ERDJ3A	NA
cds13583	2.18101	0.044677	product=universal stress protein A-like protein	NA
cds13622	-1.63621	7.55344e-22	product=polyphenol oxidase%2C chloroplastic-like	NA
cds13699	3.44806	7.29158e-10	product=late embryogenesis abundant protein Lea5-like	NA
cds13910	-3.96375	0.00992588	product=glucan endo-1%2C3-beta-glucosidase-like	NA
cds13911	-5.8045	1.1939e-06	product=glucan endo-1%2C3-beta-glucosidase	NA
cds14131	3.55543	0.0197519	product=uncharacterized protein At3g03773	NA
cds14411	-1.01491	0.000114461	product=cation/H(+) antiporter 15	NA
cds14489	-4.40867	0.000742478	product=trans-cinnamate 4-monooxygenase	NA
cds14506	-2.59363	0.00168496	product=probable chalcone--flavonone isomerase 3	NA
cds1451	6.33781	5.65947e-08	product=18.1 kDa class I heat shock protein-like	NA
cds14919	1.5004	1.91432e-19	product=probable mediator of RNA polymerase II transcription subunit 37c	NA
cds15084	-6.49255	0.00183211	product=laccase-25-like	NA
cds15097	2.41575	8.13782e-18	product=18.1 kDa class I heat shock protein	NA
cds1510	6.20797	0.00145054	product=chaperone protein DnaJ-like isoform X1	NA
cds1517	-1.04092	3.75775e-05	product=uncharacterized protein LOC105049307	NA
cds15463	3.04369	2.74402e-08	product=early light-induced protein 1%2C chloroplastic	NA
cds15575	3.76893	0.044677	product=protein SPIRAL1-like 1	NA
cds15853	1.12041	0.00844604	product=polyubiquitin 11	NA
cds16308	2.84827	0.0117868	product=dnaJ homolog subfamily B member 13-like	NA
cds16317	-2.04314	0.0467143	product=protein DEHYDRATION-INDUCED 19	NA
cds16522	4.48708	0.000655099	product=chaperone protein ClpB1-like	NA
cds16666	-5.77436	1.22111e-09	product=acidic endochitinase	Cyanoamino acid metabolism, Starch and sucrose metabolism, Phenylpropanoid biosynthesis
cds17200	2.07386	1.16966e-06	product=heat shock 70 kDa protein 14-like	NA
cds17264	4.66543	9.46161e-14	product=17.3 kDa class II heat shock protein-like	NA
cds17613	-1.6801	0.0101029	product=uncharacterized protein LOC109506112	NA
cds17665	7.53824	7.14806e-06	product=BAG family molecular chaperone regulator 6-like	NA
cds17666	6.70653	0.00020685	product=uncharacterized protein LOC109506047	NA
cds18007	2.1626	0.0256255	product=tetraketide alpha-pyrone reductase 2	NA
cds18067	9.58174	2.71136e-09	product=16.9 kDa class I heat shock protein 2-like	NA
cds18069	9.79416	9.74833e-10	product=18.1 kDa class I heat shock protein	NA
cds18319	2.33621	4.91987e-21	product=inositol-3-phosphate synthase	Streptomycin biosynthesis, Inositol phosphate metabolism
cds18398	-6.80847	0.000215022	product=EG45-like domain containing protein	NA
cds18406	3.443	0.000114758	product=protein BOBBER 1	NA
cds18456	-2.907	0.0380895	product=induced stolen tip protein TUB8-like	NA
cds18839	-5.7625	0.00270074	product=berberine bridge enzyme-like 18	NA
cds18924	-5.51837	0.00604757	product=7-deoxyloganetin glucosyltransferase-like	Ascorbate and aldarate metabolism, Zeatin biosynthesis, Pentose and glucuronate interconversions, Retinol metabolism, Steroid hormone biosynthesis
cds19963	1.44961	0.0473574	product=heat shock protein 90-2-like	NA
cds20229	-1.96772	0.0217612	product=probable polygalacturonase	NA
cds20258	-3.74867	0.0122491	product=uncharacterized protein LOC105050253	NA
cds20728	5.44482	0.00659301	product=18.1 kDa class I heat shock protein	NA
cds20729	7.61619	8.77259e-06	product=18.1 kDa class I heat shock protein	NA
cds20910	6.20704	0.000764854	product=heat shock 70 kDa protein-like	NA
cds21009	0.547209	1.64488e-08	product=uncharacterized protein LOC105050802	NA
cds21149	5.44485	0.00664787	product=uncharacterized protein LOC105050886	NA
cds21216	5.29269	0.0113473	product=uncharacterized protein LOC105050969	NA
cds21230	0.814882	0.0386042	product=calnexin homolog	NA
cds21397	3.55456	2.70301e-09	product=calponin homology domain-containing protein DDB_G0272472	NA
cds21695	6.32418	0.000664034	product=uncharacterized protein LOC105051598	NA
cds21737	1.99763	3.75775e-05	product=stromal 70 kDa heat shock-related protein%2C chloroplastic	NA
cds21937	-3.64362	7.7557e-07	product=endochitinase EP3-like	NA
cds21940	1.6457	3.05311e-05	product=endochitinase EP3-like	NA
cds22011	-1.66018	0.00333135	product=FRIGIDA-like protein 3	NA
cds22456	2.11527	0.0137364	product=LOW QUALITY PROTEIN: probable carboxylesterase 18	Drug metabolism - other enzymes
cds22608	1.97216	8.84854e-15	product=knob-associated histidine-rich protein-like	NA
cds22687	2.094	0.010172	product=uncharacterized protein LOC105052114 isoform X2	NA
cds2291	-1.5887	0.0384423	product=elongation factor 1-gamma 2	NA
cds23001	-1.85983	3.75775e-05	product=trans-cinnamate 4-monooxygenase	NA
cds23566	2.20292	3.62368e-06	product=vesicle-associated membrane protein 724	NA
cds23713	1.8324	0.0468019	product=heat shock 70 kDa protein%2C mitochondrial	NA
cds23881	2.3792	0.0125172	product=succinate dehydrogenase [ubiquinone] iron-sulfur subunit 1%2C mitochondrial	Butanoate metabolism
cds24155	-4.36875	0.0461687	product=glutamine synthetase nodule isozyme	Arginine biosynthesis, Alanine, aspartate and glutamate metabolism, Nitrogen metabolism, Glyoxylate and dicarboxylate metabolism
cds24177	2.03465	0.0275704	product=16.0 kDa heat shock protein%2C peroxisomal	NA
cds24268	3.98065	3.59699e-44	product=5-methyltetrahydropteroyltriglutamate--homocysteine methyltransferase 2-like	One carbon pool by folate, Selenocompound metabolism
cds24306	-1.47102	3.30504e-06	product=YTH domain-containing family protein 1	NA
cds24535	2.51659	0.00469996	product=BI1-like protein	NA
cds24674	-4.84714	0.0367976	product=thaumatin-like protein 1b	NA
cds24676	-6.56778	2.08443e-08	product=thaumatin-like protein 1b	NA
cds24677	-8.89226	4.75912e-08	product=thaumatin-like protein 1b	NA
cds24678	-5.40646	0.00604757	product=thaumatin-like protein 1b	NA
cds24895	6.58687	0.000207309	product=heavy metal-associated isoprenylated plant protein 9	NA
cds25090	-4.8115	0.0363821	product=myb-related protein 308-like	NA
cds25213	3.07793	1.76103e-07	product=hsp70-Hsp90 organizing protein	NA
cds25393	-2.99656	0.00347928	product=glutamate dehydrogenase 2%2C mitochondrial	Taurine and hypotaurine metabolism, D-Glutamine and D-glutamate metabolism
cds2556	-6.59595	0.0005814	product=LOW QUALITY PROTEIN: uncharacterized protein LOC105054732	NA
cds25561	-3.60525	0.0127302	product=probable 4-coumarate--CoA ligase 2	Ubiquinone and other terpenoid-quinone biosynthesis
cds2565	-5.1526	0.0127302	product=uncharacterized protein LOC105054819	NA
cds25823	-1.77726	1.33099e-06	product=phenylalanine ammonia-lyase-like	NA
cds25864	-2.11822	0.000100745	product=phosphoenolpyruvate carboxykinase [ATP]	Glycolysis / Gluconeogenesis, Carbon fixation in photosynthetic organisms, Citrate cycle (TCA cycle)
cds26002	-0.715563	0.044677	product=naringenin%2C2-oxoglutarate 3-dioxygenase	NA
cds26081	7.62629	1.9141e-17	product=heat shock protein 83	NA
cds26082	3.83959	3.44875e-19	product=heat shock protein 83-like	NA
cds26268	1.61801	0.00149198	product=luminal-binding protein 4	NA
cds26496	2.24747	6.69645e-14	product=endoplasmin homolog	NA
cds27053	-4.8497	0.0206738	product=clathrin light chain 2	NA
cds27118	4.13998	0.00538806	product=protein WALLS ARE THIN 1	NA
cds27206	3.67979	0.008098	product=ruBisCO large subunit-binding protein subunit alpha-like	NA
cds27465	-1.14036	0.0005814	product=phenylalanine ammonia-lyase	Phenylalanine metabolism
cds27668	-1.40808	0.0242169	product=flavonoid 3'-monooxygenase-like	NA
cds27734	2.4419	0.031819	product=nodulin-related protein 1	NA
cds28130	-1.44713	0.0197519	product=protein CROWDED NUCLEI 1	NA
cds28165	6.51684	0.0005814	product=non-functional NADPH-dependent codeinone reductase 2	NA
cds28384	-2.96467	0.0101247	product=F-box/kelch-repeat protein SKIP11-like	NA
cds286	-5.1535	0.020164	product=uncharacterized protein LOC105055674	NA
cds28601	-0.933308	0.00311961	product=sucrose synthase 2	NA
cds28916	0.878435	0.0226368	product=histone H2B-like	NA
cds28952	3.81298	6.94998e-45	product=probable mediator of RNA polymerase II transcription subunit 37c	NA
cds29298	1.7284	0.0242603	product=trans-cinnamate 4-monooxygenase	Stilbenoid, diarylheptanoid and gingerol biosynthesis
cds29352	3.13727	0.00646123	product=LOW QUALITY PROTEIN: 2%2C3-bisphosphoglycerate-independent phosphoglycerate mutase-like	NA
cds29428	6.03592	0.00144295	product=glutathione S-transferase U8-like	Drug metabolism - cytochrome P450, Metabolism of xenobiotics by cytochrome P450, Glutathione metabolism
cds29492	4.85089	0.0222468	product=calmodulin-like protein 5	NA
cds29592	0.996535	0.016257	product=translationally-controlled tumor protein homolog	NA
cds29652	-6.97243	0.000121058	product=pathogenesis-related protein 1-like	NA
cds29747	3.76289	1.07171e-22	product=polyubiquitin	NA
cds30141	2.0024	0.0226368	product=uncharacterized protein LOC105057911	NA
cds30149	-5.71714	0.00512567	product=truncated FRIGIDA-like protein 1	NA
cds30787	3.00256	0.0197519	product=uncharacterized protein LOC105058394	NA
cds30853	-2.9294	0.0012084	product=phospho-2-dehydro-3-deoxyheptonate aldolase 1%2C chloroplastic	Phenylalanine, tyrosine and tryptophan biosynthesis
cds3095	-3.32012	0.00476176	product=transcriptional activator DEMETER	NA
cds31282	-1.05482	0.00340521	product=LOW QUALITY PROTEIN: uncharacterized protein LOC105058786	NA
cds31356	5.43742	0.0177726	product=cytochrome c1-2%2C heme protein%2C mitochondrial	NA
cds31469	-3.23673	3.75161e-08	product=early nodulin-75-like	NA
cds31470	-2.70028	0.0113353	product=early nodulin-75-like	NA
cds31997	1.10525	0.0321462	product=histone H1-like	NA
cds32049	-6.33135	0.00036733	product=GDP-mannose 4%2C6 dehydratase 1-like	Fructose and mannose metabolism, Amino sugar and nucleotide sugar metabolism
cds32076	2.50864	0.000704324	product=bax inhibitor 1	NA
cds32128	3.08361	3.45287e-55	product=heat shock protein 83	NA
cds32432	-1.98019	0.0249169	product=chitinase 1-like	NA
cds32434	-3.03433	8.1235e-13	product=chitinase 1	NA
cds32457	2.49065	0.0368927	product=glutamate--tRNA ligase%2C cytoplasmic	Aminoacyl-tRNA biosynthesis, Porphyrin and chlorophyll metabolism
cds32983	-5.55339	1.88517e-57	product=pathogenesis-related protein PRB1-3-like	NA
cds32984	-3.07401	0.0473896	product=pathogenesis-related protein PRB1-3-like	NA
cds32985	-7.12091	3.75775e-05	product=pathogenesis-related protein PRB1-3-like	NA
cds33106	-3.22546	0.044677	product=cinnamoyl-CoA reductase 1	NA
cds33128	-2.24141	0.00992588	product=CHD3-type chromatin-remodeling factor PICKLE	NA
cds3317	-3.96606	0.00572102	product=receptor-like protein kinase HAIKU2	NA
cds33312	-3.71267	0.0116726	product=respiratory burst oxidase homolog protein C-like	NA
cds33322	0.867794	0.0197519	product=calnexin homolog	NA
cds3340	-2.18989	0.000764908	product=Bowman-Birk type trypsin inhibitor-like	NA
cds33697	6.06365	7.95006e-14	product=isoflavone reductase-like protein	NA
cds3450	2.68065	0.0467143	product=cyclic nucleotide-gated ion channel 4	NA
cds34925	-4.96469	0.0127302	product=alpha carbonic anhydrase 7-like	NA
cds35164	0.867317	0.00449211	product=probable glutathione S-transferase GSTF1	NA
cds35279	4.92643	0.0313567	product=cyclic nucleotide-gated ion channel 2	NA
cds35500	1.49846	2.0049e-07	product=70 kDa peptidyl-prolyl isomerase	NA
cds3552	-3.82698	7.00328e-05	product=protein P21-like	NA
cds35550	-4.70772	8.47687e-10	product=probable linoleate 9S-lipoxygenase 4	NA
cds35841	-5.51913	0.0105247	product=seed lectin beta chain-like	NA
cds35952	3.60823	6.57169e-05	product=internal alternative NAD(P)H-ubiquinone oxidoreductase A1%2C mitochondrial	Oxidative phosphorylation
cds36855	-1.78093	0.00362162	product=oryzain alpha chain	NA
cds37099	-2.32182	0.0480866	product=probable arabinose 5-phosphate isomerase	Lipopolysaccharide biosynthesis
cds37447	5.44262	0.0094528	product=17.6 kDa class I heat shock protein-like	NA
cds37479	-0.677756	6.80587e-05	product=uncharacterized protein LOC109505017	NA
cds37500	-9.03973	2.74402e-08	product=glucan endo-1%2C3-beta-glucosidase-like	NA
cds37955	1.67844	5.13796e-12	product=dnaJ protein homolog	NA
cds38208	1.34311	7.14806e-06	product=dnaJ protein homolog	NA
cds38904	-1.11804	0.0209526	product=5-methyltetrahydropteroyltriglutamate--homocysteine methyltransferase 1	NA
cds39942	-0.888144	0.00821802	product=leucoanthocyanidin dioxygenase-like	NA
cds40171	2.37929	0.00591127	product=defensin Ec-AMP-D2-like	NA
cds40206	3.5383	0.000519689	product=heat shock 70 kDa protein 8	NA
cds40427	-1.84444	0.0404023	product=uncharacterized protein LOC109505206	NA
cds40501	-1.56624	0.0404023	product=chalcone synthase 3-like	NA
cds40958	-8.47087	3.13158e-07	product=polyphenol oxidase%2C chloroplastic	NA
cds40973	-3.86605	0.0024804	product=chalcone synthase-like	Flavonoid biosynthesis
cds41222	1.41773	1.44366e-06	product=probable aquaporin TIP1-1	NA
cds41280	-4.85188	3.41285e-17	product=protein P21-like	NA
cds41407	-4.25133	8.434e-10	product=Bowman-Birk type trypsin inhibitor-like	NA
cds41663	3.56479	0.000637875	product=cytochrome P450 71A1-like	NA
cds41801	0.855898	0.00059268	product=photosystem II protein D1	NA
cds41816	1.56163	0.0156241	product=photosystem II protein D2	NA
cds41827	0.950803	2.64285e-05	product=ATP synthase CF1 epsilon subunit	NA
cds41829	0.499078	0.00798819	product=ribulose bisophosphate carboxylase	NA
cds41830	0.824085	0.00331551	product=acetyl-CoA carboxylase carboxyltransferase beta subunit	Fatty acid biosynthesis, Pyruvate metabolism, Carbon fixation pathways in prokaryotes, Biosynthesis of antibiotics, Propanoate metabolism, Aflatoxin biosynthesis
cds41860	0.941534	0.00701161	product=ribosomal protein S3	NA
cds41867	1.25271	0.00578214	product=ribosomal protein S7	NA
cds41871	-2.73294	0.0467143	product=cytochrome c heme attachment protein	NA
cds4264	-1.57659	0.044677	product=36.4 kDa proline-rich protein-like	NA
cds4295	-1.58398	0.00649135	product=extensin-like	NA
cds4405	0.513087	9.34682e-06	product=probable splicing factor 3A subunit 1	NA
cds4948	1.26478	0.0267468	product=alcohol dehydrogenase 1	Tyrosine metabolism, alpha-Linolenic acid metabolism, Glycine, serine and threonine metabolism, Fatty acid degradation, Naphthalene degradation, Chloroalkane and chloroalkene degradation
cds5036	5.39872	2.74402e-08	product=22.7 kDa class IV heat shock protein-like	NA
cds5037	7.29311	2.64285e-05	product=22.0 kDa class IV heat shock protein-like	NA
cds5127	-2.30039	0.00059268	product=extracellular ribonuclease LE	NA
cds5518	-2.9305	0.00118329	product=uncharacterized protein LOC105038944	NA
cds5523	-7.79751	8.01061e-06	product=tonoplast dicarboxylate transporter	NA
cds5651	-1.93821	0.0282993	product=transmembrane 9 superfamily member 11	NA
cds5753	-2.09832	0.0245797	product=putative xyloglucan endotransglucosylase/hydrolase protein 1	NA
cds5846	4.84418	0.0386042	product=UDP-glycosyltransferase 90A1-like	NA
cds5904	-5.85162	0.00285571	product=anthocyanidin 3-O-glucosyltransferase 7-like	Anthocyanin biosynthesis
cds5948	-1.74798	3.97716e-06	product=plasma membrane ATPase	NA
cds677	-1.59822	0.0119601	product=ketol-acid reductoisomerase%2C chloroplastic	Pantothenate and CoA biosynthesis, Valine, leucine and isoleucine biosynthesis
cds6973	2.13782	0.0192477	product=probable boron transporter 2	NA
cds6975	-5.28794	0.0165945	product=uncharacterized protein LOC105040012	NA
cds7027	-1.08461	0.0364131	product=S-adenosylmethionine synthase-like	Cysteine and methionine metabolism
cds7157	1.52428	0.0351485	product=transcription factor HY5	NA
cds729	5.28884	0.0197519	product=transcription repressor OFP1-like	NA
cds7337	1.57116	0.00892681	product=heat shock 70 kDa protein 14-like	NA
cds7450	9.02983	2.74402e-08	product=17.3 kDa class II heat shock protein-like	NA
cds7451	9.09945	2.29247e-08	product=17.1 kDa class II heat shock protein-like	NA
cds7830	-4.56829	0.0367976	product=phosphoenolpyruvate carboxylase%2C housekeeping isozyme-like	Methane metabolism
cds8044	3.91387	4.17257e-15	product=BAG family molecular chaperone regulator 6	NA
cds81	-6.19066	0.00285571	product=ABC transporter G family member 39-like	Purine metabolism, Thiamine metabolism
cds819	4.24907	6.87953e-13	product=chaperone protein ClpB1	NA
cds8398	-7.3488	3.76104e-05	product=chalcone synthase-like	NA
cds8444	-6.97135	0.000170303	product=pathogen-related protein-like	NA
cds8682	1.87964	0.0319563	product=uncharacterized protein LOC105041198	NA
cds8753	7.24998	2.08772e-05	product=18.1 kDa class I heat shock protein	NA
cds8754	5.31417	1.40526e-15	product=18.1 kDa class I heat shock protein-like	NA
cds8755	7.4895	4.8087e-22	product=16.9 kDa class I heat shock protein 2-like	NA
cds8758	5.8222	0.00264925	product=17.6 kDa class I heat shock protein-like	NA
cds8759	3.95171	1.53954e-29	product=16.9 kDa class I heat shock protein 2	NA
cds8928	-1.58349	0.0404023	product=probable BOI-related E3 ubiquitin-protein ligase 2	NA
cds9461	3.95245	0.00104535	product=uncharacterized protein LOC105041882	NA
cds9632	4.78148	3.08599e-12	product=17.4 kDa class III heat shock protein	NA
cds9780	-3.33726	1.45838e-25	product=pathogenesis-related protein PR-4-like	NA
cds9817	2.6064	0.0242169	product=uncharacterized protein LOC105042213	NA
